# Supplementary material for: HIV and syphilis testing for women and heterosexual men aged above 25 years in the Netherlands: possibilities for targeted testing at sexual health centres
Source: PubMed Central journal article supplement — BMJ Open. 2023 Sep 18;13(9):e072862. doi: 10.1136/bmjopen-2023-072862 (PMC10510951; doi:10.1136/bmjopen-2023-072862), 2023-09-18
Supplement: bmjopen-2023-072862.draft_revisions.pdf [file bmjopen-2023-072862.draft_revisions.pdf]

# BMJ Open

BMJ Open is committed to open peer review. As part of this commitment we make the peer review history of every article we publish publicly available.

When an article is published we post the peer reviewers' comments and the authors' responses online. We also post the versions of the paper that were used during peer review. These are the versions that the peer review comments apply to.

The versions of the paper that follow are the versions that were submitted during the peer review process. They are not the versions of record or the final published versions. They should not be cited or distributed as the published version of this manuscript.

BMJ Open is an open access journal and the full, final, typeset and author-corrected version of record of the manuscript is available on our site with no access controls, subscription charges or pay-per-view fees (<http://bmjopen.bmj.com>).

If you have any questions on BMJ Open's open peer review process please email [info.bmjopen@bmj.com](mailto:info.bmjopen@bmj.com)

# BMJ Open

## HIV and syphilis testing for heterosexuals aged above 25 years in the Netherlands: possibilities for targeted testing at Sexual Health Centers

|                               |                                                                                                                                                                                                                                                                                                                                                                                                                                                                                                                                                                                                                                                |
|-------------------------------|------------------------------------------------------------------------------------------------------------------------------------------------------------------------------------------------------------------------------------------------------------------------------------------------------------------------------------------------------------------------------------------------------------------------------------------------------------------------------------------------------------------------------------------------------------------------------------------------------------------------------------------------|
| Journal:                      | <i>BMJ Open</i>                                                                                                                                                                                                                                                                                                                                                                                                                                                                                                                                                                                                                                |
| Manuscript ID                 | bmjopen-2023-072862                                                                                                                                                                                                                                                                                                                                                                                                                                                                                                                                                                                                                            |
| Article Type:                 | Original research                                                                                                                                                                                                                                                                                                                                                                                                                                                                                                                                                                                                                              |
| Date Submitted by the Author: | 16-Feb-2023                                                                                                                                                                                                                                                                                                                                                                                                                                                                                                                                                                                                                                    |
| Complete List of Authors:     | Willemstein, Inge; National Institute for Public Health and the Environment, Centre for Infectious Disease Control<br>Götz, Hannelore ; National Institute for Public Health and the Environment, Centre for Infectious Disease Control; GGD Rotterdam-Rijnmond, Department of Public Health<br>Visser, Maartje; National Institute for Public Health and the Environment, Centre for Infectious Disease Control<br>Heijne, Janneke; National Institute for Public Health and the Environment, Centre for Infectious Disease Control; Maastricht University, Department of Social Medicine, Care and Public Health Research Institute (CAPHRI) |
| Keywords:                     | Health policy < HEALTH SERVICES ADMINISTRATION & MANAGEMENT, Epidemiology < TROPICAL MEDICINE, Sexually Transmitted Disease, HIV & AIDS < INFECTIOUS DISEASES, Syphilis, PUBLIC HEALTH                                                                                                                                                                                                                                                                                                                                                                                                                                                         |
|                               |                                                                                                                                                                                                                                                                                                                                                                                                                                                                                                                                                                                                                                                |

SCHOLARONE™  
Manuscripts

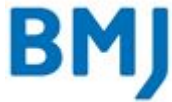

I, the Submitting Author has the right to grant and does grant on behalf of all authors of the Work (as defined in the below author licence), an exclusive licence and/or a non-exclusive licence for contributions from authors who are: i) UK Crown employees; ii) where BMJ has agreed a CC-BY licence shall apply, and/or iii) in accordance with the terms applicable for US Federal Government officers or employees acting as part of their official duties; on a worldwide, perpetual, irrevocable, royalty-free basis to BMJ Publishing Group Ltd ("BMJ") its licensees and where the relevant Journal is co-owned by BMJ to the co-owners of the Journal, to publish the Work in this journal and any other BMJ products and to exploit all rights, as set out in our [licence](#).

The Submitting Author accepts and understands that any supply made under these terms is made by BMJ to the Submitting Author unless you are acting as an employee on behalf of your employer or a postgraduate student of an affiliated institution which is paying any applicable article publishing charge ("APC") for Open Access articles. Where the Submitting Author wishes to make the Work available on an Open Access basis (and intends to pay the relevant APC), the terms of reuse of such Open Access shall be governed by a Creative Commons licence – details of these licences and which [Creative Commons](#) licence will apply to this Work are set out in our licence referred to above.

Other than as permitted in any relevant BMJ Author's Self Archiving Policies, I confirm this Work has not been accepted for publication elsewhere, is not being considered for publication elsewhere and does not duplicate material already published. I confirm all authors consent to publication of this Work and authorise the granting of this licence.

# HIV and syphilis testing for heterosexuals aged above 25 years in the Netherlands: possibilities for targeted testing at Sexual Health Centers

Inge JM Willemstein,<sup>1\*</sup> Hannelore M Götz,<sup>1,2,3</sup> Maartje Visser,<sup>1</sup> Janneke CM Heijne.<sup>1,4</sup>

<sup>1</sup> Centre for Infectious Diseases Control, National Institute for Public Health and the Environment, Bilthoven, The Netherlands

<sup>2</sup> Department of Public Health, Municipal Public Health Service Rotterdam-Rijnmond, Rotterdam, The Netherlands

<sup>3</sup> Department of Public Health, Erasmus MC, University Medical Center Rotterdam, Rotterdam, The Netherlands

<sup>4</sup> Department of Social Medicine, Care and Public Health Research Institute (CAPHRI), Maastricht University, Maastricht, The Netherlands

\*Corresponding author: Inge Willemstein, National Institute for Public Health and the Environment,

P.O. Box 1, 3720 BA Bilthoven, The Netherlands. Tel: +316 29 64 69 60, email:

inge.willemstein@rivm.nl

**Article type:** Original research

**Keywords:** HIV; sexually transmitted diseases; Health Policy; epidemiology; Health Services Research

Word count main text: 2,991 words

Abstract: 295 words

References: 28

Figures: 1

Tables: 2

Supplemental tables: 3

## ABSTRACT

### Objectives

Targeted testing policy for HIV/syphilis at Dutch sexual health clinics (SHCs) was evaluated for its efficiency in younger heterosexuals but not for heterosexuals  $\geq 25$  years. Currently, all older heterosexuals are tested for HIV/syphilis at SHCs. To explore possibilities for increased efficiency of testing in heterosexuals aged  $>25$  years, this study aimed to identify determinants predictive for HIV and syphilis diagnoses that could be used in targeted testing strategies.

### Methods

Dutch surveillance data of SHC consultations of women and heterosexual men  $>25$  years between 2015-2021 were included. By univariate and multivariate logistic regression, determinants for HIV and/or syphilis diagnosis were analyzed. Based on these determinants and their applicability in SHC practice, different targeted testing scenarios were evaluated. For each scenario, the percentage of consultations involving HIV and syphilis testing and the total amount of missed HIV and syphilis diagnoses were calculated.

### Results

109,122 consultations were included among 75,718 individuals. The strongest determinants for HIV/syphilis diagnosis were HIV/syphilis-specific symptoms and receiving partner notification, followed by low/middle education level, male sex and age  $\geq 30$  years. When applying feasible determinants to targeted testing scenarios, HIV/syphilis testing would have been conducted in 54.5% of all consultations, missing 2 HIV and 3 syphilis diagnoses annually (13.4% and 11.4% of all diagnoses, respectively). In the scenario with the lowest number of missed HIV/syphilis diagnoses (0.3 HIV and 2 syphilis diagnoses annually), HIV/syphilis testing would have been conducted in 74.2% of all consultations.

### Conclusions

This study is a first step into considering targeted testing for older heterosexuals in SHCs. In any targeted testing scenario studied, HIV and/or syphilis diagnoses would have been missed. This raises the question whether it is acceptable to put any of these scenarios into practice. This study contributes to a discussion about the impact of targeted testing policy.

## KEY MESSAGES

### What is already known on this topic

- Heterosexuals aged  $\geq 25$  years that fulfill high risk triage criteria at sexual health centers in the Netherlands are routinely tested for four STI (chlamydia, gonorrhoea, HIV and syphilis), but possibilities for targeted testing in order to increase effectiveness are unknown.

### What this study adds

- HIV/syphilis specific symptoms and partner notification were strongly associated with a positive HIV/syphilis diagnosis, all other associations were less strong.
- In all possible targeted STI testing scenarios in this study, HIV and syphilis diagnoses would still have been missed annually.

### How this study might affect research, practice or policy

- This study stresses the importance of continuous evaluation of STI testing policy.
- Further research into ethical considerations and financial costs of targeted STI testing policy is needed.

## INTRODUCTION

In many countries, sexually transmitted infections (STI) testing guidelines for women and heterosexual men aged >25 years are different from testing guidelines for those aged <25 years old. This is mainly the case for *Chlamydia trachomatis* (chlamydia) and *Neisseria gonorrhoeae* (gonorrhoea), where testing in women and heterosexual men aged  $\geq 25$  years is often recommended at certain indications only.<sup>1-3</sup> However, for syphilis and HIV differentiation in testing guidelines based on age is often not described. According to CDC, HIV screening should be offered to all individuals who seek care at Sexual Health Centers (SHCs) and syphilis screening to individuals at increased risk.<sup>1</sup> According to IUSTI guidelines (contributed by ECDC and the European Office of the WHO), both HIV and syphilis tests should be offered to all SHC attendees.<sup>4,5</sup>

In the Netherlands, all women and heterosexual men aged <25 years are eligible for testing at SHCs. Women and heterosexual men aged  $\geq 25$  years are eligible for testing at SHCs if they meet at least one of the following triage criteria: notified by a sexual contact, STI symptoms, having had a STI in the past year, female partner of MSM, commercial sex workers (CSW), originating from or having a partner from a STI-endemic area, or being a victim of sexual violence.<sup>6</sup> This older heterosexual group is routinely tested for four STI (chlamydia, gonorrhoea, HIV and syphilis) while women and heterosexual men aged <25 years are only tested for HIV and syphilis on indication.<sup>6,7</sup> This restrictive testing among young heterosexuals was introduced to decrease costs, as government funding for SHCs changed. Evaluation of this testing policy was conducted,<sup>8</sup> and targeted testing of HIV and syphilis on indication was found to be cost-effective; approximately 3 HIV and 7 syphilis diagnoses were missed annually. Nevertheless, evaluation data of STI testing for older heterosexuals remains limited.

For older women and heterosexual man, more insight is needed in the characteristics of SHC visitors with HIV and syphilis diagnoses, in order to explore possibilities for targeted testing in this group as well. Therefore, the objective of this study was to identify determinants predictive for HIV and syphilis diagnoses among all STI clinic consultations of women and heterosexual men aged above 25 years that could possibly be used in targeted testing strategies.

## METHODS

### Study population

National surveillance data of Sexual Health Centers (SHCs) in the Netherlands (SOAP) of women and heterosexual men aged above 25 years were used for this study. Consultations were selected from 2015 to 2021, as in 2015 government funding for SHC testing policy changed and consequently the

1  
2  
3 characteristics of people visiting the SHCs.<sup>9</sup> All women were included and heterosexual men were  
4 defined as men with self-reported sexual contact with women only in the past 6 months . Men who  
5 had sex with both men and women and men with unknown sexual behavior were excluded. Age was  
6 calculated by subtracting birth year (date was not available) from consultation year. To prevent  
7 misclassification of 25 year-olds in the study population (who have different testing guidelines),  
8 people aged 26 years and older were selected. Consultations were excluded for 1) individuals with  
9 specific testing policies (e.g. sex workers, transgender persons, pre-exposure prophylaxis (PrEP)), 2)  
10 consultations which did not include routine practice (not tested for chlamydia, gonorrhoea, syphilis  
11 and HIV)<sup>6</sup>, 3) consultations of people living with HIV and 4) consultations of individuals aged  $\geq 60$  years  
12 due to small numbers.  
13  
14  
15  
16  
17  
18  
19

## 20 21 **Definitions**

22  
23 The outcome of this study was a diagnosis of HIV and/or syphilis (infectious syphilis, being  
24 primary/secondary syphilis or syphilis latens recens). Both STI were combined in one dichotomous  
25 variable in the main analysis, as HIV and syphilis testing both requires taking a blood sample. Available  
26 self-reported demographic and sexual behavioral variables were included in the model as possible  
27 determinants for an HIV/syphilis diagnosis. Age was dichotomized into categories 26-29 and  $\geq 30$  to  
28 create equally distributed groups. Education level was dichotomized to two categories: low/middle  
29 education level (no education, primary education only or vocational education) or high level education  
30 (all other education levels). Other variables included were; notified for STI (specifically for HIV/syphilis  
31 or another/unspecified STI), STI symptoms (overall and if so, HIV/syphilis specific), originating from an  
32 STI-endemic area (based on country of birth of both the individual and parents<sup>10</sup>), partner from risk  
33 group (STI-endemic area or MSM), STI (gonorrhoea, chlamydia, syphilis) diagnosis in the past year  
34 (persons who were not tested, were tested negative or test results were unknown were categorized  
35 as no STI history), number of partners in the past six months, being a client of CSW, having a chlamydia  
36 and/or gonorrhoea diagnosis at the same consultation, and condom use. Before 2018 condom use  
37 was reported at last sexual contact, after 2018 this was reported in the past 6 months at vaginal and/or  
38 anal sex; both were combined in one dichotomous variable (always with a condom in the past 6  
39 months/last sex with a condom or not always/never with a condom in the past 6 months/last sex  
40 without condom).  
41  
42  
43  
44  
45  
46  
47  
48  
49  
50  
51  
52  
53

## 54 **Statistical analyses**

55  
56 Determinants predictive for an HIV/syphilis diagnosis were analyzed using logistic regressions. If  
57 missing values within one variable were more than 5% they were included in analyses as a separate  
58 category, missing values less than 5% were excluded. We first checked whether we had to take into  
59  
60



1  
2  
3 account that one person could be included in the dataset with multiple consultations. The additional  
4 value of adding a random intercept on person level to the model was checked by comparing Akaike  
5 Information Criterion (AIC) values between the intercept-only model with and without a random  
6 intercept. Then, univariate logistic regression analyses were performed for all determinants separately  
7 as independent variable and HIV/syphilis diagnosis as dependent variable. Last, all variables were  
8 included in a multivariable model constructed based on backward elimination using AIC. For all  
9 significant determinants that remained in the final model, effect modification was examined by adding  
10 interaction terms to all univariate regressions separately. For any significant effect modifiers stratified  
11 analyses were performed.

12  
13  
14  
15  
16  
17  
18  
19 Three sensitivity analyses were performed. First, as determinants for an HIV and syphilis  
20 diagnosis might be different, separate analyses were performed per STI. Second, the variable anal sex  
21 in the past six months was only collected from 2016 onwards, therefore another model was conducted  
22 over the years 2016-2021 with anal sex added as a possible determinant.<sup>11-14</sup> Finally, a model was  
23 conducted over the years 2015-2019 to restrict the analysis to pre-COVID-19 years. During the COVID-  
24 19 pandemic, STI care in the Netherlands was downscaled, resulting in less and more targeted SHC  
25 consultations in 2020 and 2021.<sup>9</sup> All analyses were performed in R (version 4.2.0, packages tidyverse,  
26 gtsummary, broom, janitor, lme4).

### 32 33 **Targeted testing**

34  
35 In order to assess possibilities for targeted testing, different scenarios were built up. The scenarios  
36 were based on determinants in the final regression model that were also applicable for use in practice.  
37 This was also supplemented with determinants for HIV and syphilis from the separate models. For  
38 each scenario the percentage of consultations involving HIV/syphilis testing and the total and average  
39 per year of missed HIV and syphilis diagnoses between 2015 and 2021 were calculated.

### 46 47 **PATIENT AND PUBLIC INVOLVEMENT**

48  
49 Patients and/or the public were not involved in the design, or conduct, or reporting, or dissemination  
50 plans of this research. Only data from the national surveillance system were used.

## RESULTS

### Study population

Between January 2015 and December 2021, 147,003 STI consultations among women and heterosexual men aged >25 years were registered (figure 1). In total, 37,881 (25.8%) consultations were excluded due to various reasons including sex work (n = 28,486), transgender persons (n = 1,154), PrEP consultation (n = 43), non-routine testing (n = 5,708), prevalent HIV infections (n = 10) or age  $\geq$ 60 years (n = 2,480), leaving 109,122 consultations for analysis among 75,718 individuals. In these consultations, 184 new syphilis diagnoses (0.2%) were reported and 82 HIV diagnoses (0.1%). In one consultation both syphilis and HIV were diagnosed.

In the study population, sex was equally distributed (table 1). Most people had a higher education level and originated from a non-STI/HIV-endemic area. Chlamydia was the most diagnosed STI (12.4% of all consultations). The number of consultations per year decreased over time.

### Determinants for HIV and/or syphilis

The strongest determinants for HIV/syphilis diagnosis in univariate analyses were HIV/syphilis specific symptoms and partner notification for HIV/syphilis (table 2). In multivariate analyses these two remained the strongest determinants (adjusted Odds Ratio (aOR) 34.9; 95% Confidence Interval (CI) 24.1-50.2 and OR 18.3; 95% CI 13.2-25.2, resp.). Other significant determinants were male sex, being aged  $\geq$ 30 years and low/middle education level. Persons who used condoms or had two or more sex partners in the past six months were less likely to have an HIV/syphilis diagnosis. Correcting for multiple consultations within one person was not necessary as the AIC values of the intercept-only model with and without a random intercept were approximately equal.

STI symptoms and partner notification were found to be significant effect modifiers. In stratified analyses for STI symptoms (supplemental table S1) the same determinants were found and the direction of the effects did not change. Additionally, self-reported STI in the past year became an extra predictor for persons with HIV/syphilis-specific symptoms. In stratified analyses for partner notification (supplemental table S2) the direction of the effects also did not change. However, sex and age were no determinants anymore and chlamydia/gonorrhoeae diagnosis in the same consultation became an additional predictor for persons with HIV/syphilis-specific partner notification.

In all sensitivity analyses (HIV/syphilis separately, including anal sex and excluding COVID years) (supplemental table S3) the same determinants and direction of effects were found as the initial model, except for reported HIV/syphilis symptoms which was not a predictor for HIV diagnosis. An additional significant predictor for HIV diagnosis was originating from an STI/HIV-endemic area, while

1  
2  
3 this was protective for syphilis. For syphilis diagnosis, self-reported STI in the past year was an  
4 additional predictive determinant. In analyses including anal sex, anal sex was an additional significant  
5 determinant predictive for HIV/syphilis diagnosis. Finally, restricting the analyses to pre-COVID-years  
6 made no large differences to the initial model.  
7  
8  
9

### 10 **Targeted testing**

11  
12 If targeted testing was only applied to SHC consultations who reported HIV/syphilis symptoms (the  
13 strongest predictor), in 0.6% of all consultations between 2015 and 2021 HIV/syphilis testing would  
14 have been conducted (table 3, scenario 1). Yet 95.1% of HIV diagnoses and 58.2% of syphilis diagnoses  
15 would then be missed, which corresponds to 11 and 15 missed diagnoses per year. If notified for  
16 HIV/syphilis by a partner would be added as testing criterium (the second most strongest predictor;  
17 scenario 2), in approximately 2% of all consultations HIV/syphilis testing would have been conducted,  
18 diagnosing 36.6% of all HIV and 64.7% of all syphilis diagnoses. Other significant determinants were  
19 education level, sex and age. Only age was assessed as applicable to SHC practice and age > 30 years  
20 was added to scenario 3, resulting in 54.5% of all consultations wherein HIV/syphilis testing would  
21 have been conducted resulting in missing 2 HIV and 3 syphilis diagnoses annually. Finally, when adding  
22 the separate determinants for HIV and syphilis diagnosis (self-reported STI in the past year and  
23 originating from STI/HIV-endemic area; scenario 4), in 74.2% of all consultations HIV/syphilis testing  
24 would still have been conducted, missing 0.3 HIV and 2 syphilis diagnoses on average per year.  
25  
26  
27  
28  
29  
30  
31  
32  
33  
34  
35  
36  
37

### 38 **DISCUSSION**

39  
40 The strongest determinants predictive for an HIV/syphilis diagnosis in women and heterosexual men  
41 aged over 25 years visiting SHCs were received partner notification for HIV/syphilis and reported  
42 HIV/syphilis symptoms. Persons aged  $\geq 30$  years were also more likely to have an HIV/syphilis  
43 diagnosis. When applying these determinants to targeted testing scenarios, HIV/syphilis testing would  
44 still have been conducted in 54.5% of all consultations, missing 2 HIV and 3 syphilis diagnoses annually.  
45 The scenario that resulted in the lowest number of missed HIV/syphilis diagnoses was when  
46 determinants for HIV or syphilis separately were also included, resulting in 0.3 HIV and 2 syphilis  
47 diagnoses missed annually. However, only in 26% of all consultations a HIV/syphilis tests would have  
48 been omitted between 2015 and 2021.  
49  
50  
51  
52  
53  
54

55  
56 This is the first study in the Netherlands to describe determinants predictive for an HIV/syphilis  
57 diagnosis among women and heterosexual men aged >25 years. By the use of national surveillance  
58 data of Sexual Health Centers a large study sample was guaranteed. However, there were some  
59  
60

1  
2  
3 limitations. First, SOAP data did not allow to include all variables in the analyses as some questions  
4 contained too many missings. Especially victim of sexual violence would have been interesting as it is  
5 a HIV/syphilis test criterium for heterosexuals <25 years but could not be included due to too many  
6 missings. However, in consultations that did contain information on sexual violence, only one HIV  
7 diagnosis was found among victims of sexual violence, so we do not expect that including this variable  
8 would have changed our results. Second, HIV and syphilis were included in one combined outcome  
9 variable, while one might argue that the main analyses should have been separated in advance.  
10 However, as we intended to explore effectiveness of potential STI targeted testing strategies in this  
11 study, we think that combined HIV/syphilis testing would be most effective for SHC practice as both  
12 HIV and syphilis tests are conducted on a blood sample. Once blood is taken integrated testing for HIV  
13 and syphilis is most convenient. Furthermore, since the number of diagnoses were small, combining  
14 the two also increased the power. Sensitivity analyses showed different determinants when  
15 separating the two. For example, origin from an STI-endemic area was a predictor for HIV only and  
16 reported HIV/syphilis symptoms was a strong predictor for syphilis but not for HIV. This could be  
17 explained by syphilis symptoms being more often present and more recognizable than HIV  
18 symptoms.<sup>15</sup> Finally, in this study we estimated missed HIV/syphilis diagnoses annually based on  
19 numbers of HIV/syphilis diagnoses between 2015-2021 and did not take into account an effect of time  
20 to diagnosis. Delayed diagnoses could lead to, for example, delayed healthcare and/or further  
21 HIV/syphilis transmission, causing different annual numbers of missed HIV/syphilis diagnoses in reality  
22 then estimated in this study.

23  
24  
25  
26  
27  
28  
29  
30  
31  
32  
33  
34  
35  
36  
37  
38  
39  
40  
41  
42  
43  
44  
45  
46  
47  
48  
49  
50  
51  
52  
53  
54  
55  
56  
57  
58  
59  
60  
To our knowledge, no other studies have been performed on determinants predictive for both  
HIV and/or syphilis diagnoses as one outcome, apart from co-infections. For determinants for HIV and  
syphilis diagnoses separately the targeted populations between studies differ greatly, hampering  
comparison of our study results.<sup>16-23</sup> However, determinants in our study consistent with existing data  
were partner notification and lower education level, found to be predictive for both HIV and syphilis<sup>6</sup>  
<sup>9 16-18</sup> and STI symptoms and male sex found to be predictive for syphilis only.<sup>6 19</sup> Yet an unexpected  
result in our study was that persons with two or more partners would be at decreased risk for  
HIV/syphilis diagnosis, as multiple partners are usually determinants for STI.<sup>9 17 22</sup> This difference could  
be explained by the strict triage criteria for heterosexuals  $\geq 25$  years at SHC, making this a higher risk  
group compared to, for example, heterosexuals <25 years who are all eligible for STI testing. Another  
explanation for these reversed effects in our study might be by unmeasured variables like reasons for  
testing.

Using the determinants predictive of an HIV/syphilis diagnoses, we constructed potential  
strategies for targeted testing. The testing scenarios were built up based on significant determinants

1  
2  
3 in the model, combined with feasibility in SHC practice. Targeted testing based on sex and education  
4 level were considered not feasible as this might lead to discrimination and/or stigmatization. Yet these  
5 results do stress the importance of reaching out to persons with low/middle-education level and  
6 making sure that STI care at SHC is accessible for this group.<sup>24</sup> The regression model showed that the  
7 only outstanding determinants predictive for HIV/syphilis diagnosis were HIV/syphilis specific  
8 symptoms and partner notification. Partner notification contributed to approximately half of all  
9 HIV/syphilis diagnoses found in our study. This underlines the great potential of partner notification  
10 in STI case detection, and stresses the importance of partner notification in STI control. All other  
11 determinants in the regression model had odds ratios close to one, meaning that specific risk groups  
12 were hard to identify within the group of heterosexuals older than 25 years at SHC. This might indicate  
13 that the current triage criteria for this group to be eligible for STI testing at SHC are effective in finding  
14 the persons at higher risk for STI.

15  
16 In every targeted scenario evaluated, HIV and/or syphilis diagnoses will be missed. It should  
17 be questioned whether it is acceptable in an era of aiming at going towards zero new HIV infections  
18 to put any of these targeted testing scenarios into practice. A study on targeted HIV/syphilis testing  
19 for heterosexuals <25 years estimated that 3 missed HIV and 7 missed syphilis diagnoses annually  
20 were considered to be limited, when 3,3 million euros could be saved.<sup>8</sup> An evaluation of test cost  
21 savings for women and heterosexual men aged >25 years is needed to make informed decisions.  
22 Additionally, ethical aspects should be considered to decide how many diagnoses are acceptable to  
23 be missed. The UNAIDS announced the target to reach zero HIV infections in 2030<sup>25</sup> and STI AIDS  
24 Netherlands also set the aim to reach zero new HIV infections as soon as possible.<sup>15</sup> To reach this, any  
25 missed diagnosis would be too much and timely diagnosis of HIV is necessary. In the Netherlands,  
26 diagnosis of late-stage HIV is more common among women and heterosexual men compared to  
27 MSM<sup>26</sup> and also in the UK it is shown that syphilis often remains undiagnosed, especially among  
28 heterosexual men.<sup>27</sup> Additionally, there are concerns that syphilis in women of reproductive age could  
29 lead to congenital syphilis, a severe disease causing child mortality.<sup>28</sup> Finally, complications of non-  
30 detected cases could lead to increased costs, either through treatment of severe disease or additional  
31 testing in general practice or hospitals. We recommend all these considerations to be taken into  
32 account when assessing targeted testing policy.

33  
34 Altogether, this study is a first step in considering targeted testing for HIV and syphilis of  
35 women and heterosexual men aged >25 years in the Netherlands. It is indicated that no specific group  
36 can be identified for targeted testing without missing any HIV/syphilis diagnoses. A discussion with a  
37 multidisciplinary team consisting of public health professionals, policy makers, ethicists, economists,  
38  
39  
40  
41  
42  
43  
44  
45  
46  
47  
48  
49  
50  
51  
52  
53  
54  
55  
56  
57  
58  
59  
60

1  
2  
3 epidemiologists and all others involved about the public health impact of targeted testing policy is  
4 needed.  
5  
6  
7  
8

## 9 **ACKNOWLEDGMENTS**

10  
11 The authors thank Birgit van Benthem, Susan van den Hof and Jaap van Dissel for their constructive  
12 comments on the manuscript. Also, Maarten Schipper is thanked for statistical advice on the analyses.  
13  
14  
15

## 16 **CONTRIBUTORS**

17  
18 IW, HG and JCMH designed the study. IW and MV cleaned the data. IW analyzed the data and drafted  
19 the manuscript. All authors contributed to the interpretation of the results, commented on the  
20 manuscript and approved the final version.  
21  
22  
23  
24  
25

## 26 **FUNDING**

27  
28 The author(s) received no financial support for the research, authorship, and/or publication of this  
29 article.  
30  
31  
32  
33

## 34 **COMPETING INTERESTS**

35  
36 None declared.  
37  
38  
39  
40  
41

## 42 **ETHICS APPROVAL AND CONSENT TO PARTICIPATE**

43  
44 Ethical approval for the study was not necessary following the Dutch Medical Research (involving  
45 Human Subjects) Act, as the study uses routinely collected, anonymous surveillance data (Wet  
46 medisch-wetenschappelijk onderzoek met mensen 1998 §1 artikel 1).  
47  
48  
49  
50

## 51 **DATA AVAILABILITY STATEMENT**

52  
53 This study uses data from the Dutch national registration of sexual health centre consultations (SOAP).  
54 Data can be requested for scientific use from the SOAP registration committee (contact soap@  
55 rivm.nl).  
56  
57  
58  
59  
60

## REFERENCES

1. Workowski KA, Bachmann LH, Chan PA, et al. Sexually Transmitted Infections Treatment Guidelines, 2021. *MMWR Recomm Rep* 2021;70(4):1-187.
2. Lanjouw E, Ouburg S, de Vries HJ, et al. 2015 European guideline on the management of Chlamydia trachomatis infections. *Int J STD AIDS* 2016;27(5):333-48.
3. Unemo M, Ross J, Serwin AB, et al. 2020 European guideline for the diagnosis and treatment of gonorrhoea in adults. *Int J STD AIDS* 2020;956462420949126.
4. Janier M, Unemo M, Dupin N, et al. 2020 European guideline on the management of syphilis. *J Eur Acad Dermatol Venereol* 2021;35(3):574-88.
5. Gökengin D, Wilson-Davies E, Nazlı Zeka A, et al. 2021 European guideline on HIV testing in genito-urinary medicine settings. *J Eur Acad Dermatol Venereol* 2021;35(5):1043-57.
6. National Institute for Public Health and the Environment (RIVM). [Draaiboek voor Centra Seksuele Gezondheid in de Publieke Gezondheidszorg]. 2022. <https://lci.rivm.nl/draaiboeken/consult-seksuele-gezondheid> (accessed 28 March 2022).
7. Suijkerbuijk AW, Over EA, Koedijk FD, et al. [More efficient testing policy at STI clinics]. *Ned Tijdschr Geneesk* 2014;158:A6980.
8. Suijkerbuijk AWM, Over EAB, van Aar F, et al. Consequences of restricted STI testing for young heterosexuals in the Netherlands on test costs and QALY losses. *Health Policy* 2018;122(2):198-203.
9. van Wees DA, Visser M, van Aar F, et al. Sexually transmitted infections in the Netherlands in 2021. Bilthoven: National Institute for Public Health and the Environment (RIVM), 2022.
10. Statistics Netherlands (CBS). [Migratieachtergrond] [online]. 2022. <https://www.cbs.nl/nl-nl/onze-diensten/methoden/begrippen/migratieachtergrond> (accessed 7 September 2022).
11. Elmes J, Silhol R, Hess KL, et al. Receptive anal sex contributes substantially to heterosexually acquired HIV infections among at-risk women in twenty US cities: Results from a modelling analysis. *Am J Reprod Immunol* 2020;84(2):e13263.
12. O'Leary A, DiNenno E, Honeycutt A, et al. Contribution of Anal Sex to HIV Prevalence Among Heterosexuals: A Modeling Analysis. *AIDS Behav* 2017;21(10):2895-903.
13. Rahman N, Ghanem KG, Gilliams E, et al. Factors associated with sexually transmitted infection diagnosis in women who have sex with women, women who have sex with men and women who have sex with both. *Sex Transm Infect* 2021;97(6):423-28.
14. van Liere G, Dukers-Muijers N, Levels L, et al. High Proportion of Anorectal Chlamydia trachomatis and Neisseria gonorrhoeae After Routine Universal Urogenital and Anorectal Screening in Women Visiting the Sexually Transmitted Infection Clinic. *Clin Infect Dis* 2017;64(12):1705-10.
15. National Institute for Public Health and the Environment (RIVM). [Richtlijnen & Draaiboeken] [online]. 2022. <https://lci.rivm.nl/richtlijnen> (accessed 20 October 2022).
16. Gupta N, Niyas VKM, Nischal N, et al. Epidemiological trends in patients living with human immunodeficiency virus: a 13-year experience from a tertiary care center in India. *Infez Med* 2019;27(3):308-15.
17. Nishiki S, Arima Y, Yamagishi T, et al. Syphilis in heterosexual women: case characteristics and risk factors for recent syphilis infection in Tokyo, Japan, 2017-2018. *Int J STD AIDS* 2020;31(13):1272-81.
18. Hurtado I, Alastrue I, Pavlou M, et al. Increased syphilis trend among patients in an AIDS information and prevention center. *Gac Sanit* 2011;25(5):368-71.
19. Spiteri G, Unemo M, Mårdh O, et al. The resurgence of syphilis in high-income countries in the 2000s: a focus on Europe. *Epidemiol Infect* 2019;147:e143.
20. Erdinc FS, Dokuzoguz B, Unal S, et al. Temporal Trends in the Epidemiology of HIV in Turkey. *Curr HIV Res* 2020;18(4):258-66.
21. Saxton PJW, McAllister SM, Thirkell CE, et al. Population rates of HIV, gonorrhoea and syphilis diagnoses by sexual orientation in New Zealand. *Sex Transm Infect* 2022;98(5):376-79.



- 1
  - 2
  - 3
  - 4
  - 5
  - 6
  - 7
  - 8
  - 9
  - 10
  - 11
  - 12
  - 13
  - 14
  - 15
  - 16
  - 17
  - 18
  - 19
  - 20
  - 21
  - 22
  - 23
  - 24
  - 25
  - 26
  - 27
  - 28
  - 29
  - 30
  - 31
  - 32
  - 33
  - 34
  - 35
  - 36
  - 37
  - 38
  - 39
  - 40
  - 41
  - 42
  - 43
  - 44
  - 45
  - 46
  - 47
  - 48
  - 49
  - 50
  - 51
  - 52
  - 53
  - 54
  - 55
  - 56
  - 57
  - 58
  - 59
  - 60
22. Harrington P, Onwubiko U, Qi M, et al. Factors Associated with HIV Seroconversion Among Women Attending an Urban Health Clinic in the South: A Matched Case-Control Study. *AIDS Patient Care STDS* 2020;34(3):124-31.
23. Chen M, Ma Y, Chen H, et al. Demographic characteristics and spatial clusters of recent HIV-1 infections among newly diagnosed HIV-1 cases in Yunnan, China, 2015. *BMC Public Health* 2019;19(1):1507.
24. Slurink IA, Götz HM, van Aar F, et al. Educational level and risk of sexually transmitted infections among clients of Dutch sexual health centres. *Int J STD AIDS* 2021;32(11):1004-13.
25. UNAIDS Joint United Nations Programme on HIV/AIDS. Fast-track: ending the AIDS epidemic by 2030. Geneva: UNAIDS, 2014.
26. van Sighem AI, Wit FWNM, Boyd A, et al. Monitoring Report 2021. Human Immunodeficiency Virus (HIV) Infection in the Netherlands. Amsterdam: stichting hiv monitoring, 2021.
27. Harvala H, Reynolds C, Fabiana A, et al. Lessons learnt from syphilis-infected blood donors: a timely reminder of missed opportunities. *Sex Transm Infect* 2022;98(4):293-97.
28. Keuning MW, Kamp GA, Schonenberg-Meinema D, et al. Congenital syphilis, the great imitator-case report and review. *Lancet Infect Dis* 2020;20(7):e173-e79.



## TABLES

**Table 1** Number and percentage of consultations by different characteristics of women and heterosexual men aged >25 years visiting Dutch SHCs between 2015 and 2021

|                                        | Consultations |      |
|----------------------------------------|---------------|------|
|                                        | n             | %    |
| Total number of consultations          | 109,122       | 100  |
| Number of individuals                  | 75,718        | 69.4 |
| Consultation number per individual     |               |      |
| 1                                      | 75,718        | 69.4 |
| >1                                     | 33,404        | 30.6 |
| Sex                                    |               |      |
| Men                                    | 54,531        | 50.0 |
| Women                                  | 54,591        | 50.0 |
| Age                                    |               |      |
| 26-29 years                            | 50,287        | 46.1 |
| 30+ years                              | 58,835        | 53.9 |
| Education level*                       |               |      |
| High                                   | 59,453        | 54.5 |
| Low/middle                             | 41,716        | 38.2 |
| Unknown/other                          | 7,953         | 7.3  |
| Originating from STI/HIV-endemic area† |               |      |
| No                                     | 64,782        | 59.4 |
| Yes                                    | 44,234        | 40.5 |
| Unknown                                | 106           | 0.1  |
| STI diagnoses‡                         |               |      |
| Chlamydia                              | 13,539        | 12.4 |
| Gonorrhoea                             | 2,403         | 2.2  |
| Syphilis, infectious§                  | 184           | 0.2  |
| HIV                                    | 82            | 0.1  |
| Year consult                           |               |      |
| 2015                                   | 22,322        | 20.5 |
| 2016                                   | 21,306        | 19.5 |
| 2017                                   | 19,855        | 18.2 |
| 2018                                   | 15,951        | 14.6 |
| 2019                                   | 11,395        | 10.4 |
| 2020                                   | 8,330         | 7.6  |
| 2021                                   | 9,963         | 9.1  |

\* Low/middle level of education: no education, elementary school, lbo, mavo, vmbo, mbo-1, havo, vwo, gymnasium. High level education: all other education levels.  
† STI/HIV-endemic areas include Asia, Africa, the Dutch Caribbean islands, Middle and South America.  
‡ Consultations could be counted double when multiple STI were found at the same consultation.  
§ Infectious syphilis includes primary syphilis, secondary syphilis and syphilis latens recens.

**Table 2** Determinants for an HIV and/or syphilis diagnosis among women and heterosexual men aged >25 years visiting Dutch sexual health services between 2015-2021

|                                              | HIV and/or syphilis negative<br>n (%) | HIV and/or syphilis positive<br>n (%) | Crude OR (95% CI)     | Adjusted OR (95% CI) |
|----------------------------------------------|---------------------------------------|---------------------------------------|-----------------------|----------------------|
| Total number of consultations*               | 103,580 (99.8)                        | 242 (0.2)                             |                       |                      |
| Sex                                          |                                       |                                       |                       |                      |
| Women                                        | 51,905 (99.8)                         | 84 (0.2)                              | 1                     | 1                    |
| Men                                          | 51,675 (99.7)                         | 158 (0.3)                             | <b>1.9 (1.5-2.5)</b>  | <b>2.2 (1.6-3.0)</b> |
| Age                                          |                                       |                                       |                       |                      |
| 26-29 years                                  | 48,175 (99.9)                         | 58 (0.1)                              | 1                     | 1                    |
| 30+ years                                    | 55,405 (99.7)                         | 184 (0.3)                             | <b>2.8 (2.1-3.7)</b>  | <b>1.8 (1.3-2.5)</b> |
| CT and/or GO positivity at same consultation |                                       |                                       |                       |                      |
| No                                           | 89,023 (99.8)                         | 211 (0.2)                             | 1                     | -                    |
| Yes                                          | 14,557 (99.8)                         | 31 (0.2)                              | 0.90 (0.6-1.3)        | -                    |
| Self-reported GO/CT/SYPH in past year        |                                       |                                       |                       |                      |
| No                                           | 94,871 (99.8)                         | 215 (0.2)                             | 1                     | -                    |
| Yes                                          | 8,709 (99.7)                          | 27 (0.3)                              | 1.4 (0.9-2.0)         | -                    |
| Education level†                             |                                       |                                       |                       |                      |
| High                                         | 57,104 (99.9)                         | 54 (0.1)                              | 1                     | 1                    |
| Low/middle                                   | 39,494 (99.6)                         | 142 (0.4)                             | <b>3.8 (2.8-5.2)</b>  | <b>2.8 (2.0-4.0)</b> |
| Unknown/other                                | 6,982 (99.3)                          | 46 (0.7)                              | <b>7.0 (4.7-10.3)</b> | <b>4.2 (2.7-6.4)</b> |
| Number of sex partners in past six months    |                                       |                                       |                       |                      |
| 0-1                                          | 23,673 (99.6)                         | 107 (0.4)                             | 1                     | 1                    |
| 2-3                                          | 42,110 (99.8)                         | 88 (0.2)                              | <b>0.5 (0.3-0.6)</b>  | <b>0.7 (0.5-0.9)</b> |
| 4+                                           | 37,797 (99.9)                         | 47 (0.1)                              | <b>0.3 (0.2-0.4)</b>  | <b>0.4 (0.3-0.6)</b> |
| Condom use‡                                  |                                       |                                       |                       |                      |
| No                                           | 86,413 (99.8)                         | 214 (0.2)                             | 1                     | 1                    |
| Yes                                          | 17,167 (99.8)                         | 28 (0.2)                              | 0.7 (0.4-1.0)         | <b>0.6 (0.4-0.9)</b> |
| Originating from STI/HIV-endemic area§       |                                       |                                       |                       |                      |

|                                 |               |           |                          |                         |
|---------------------------------|---------------|-----------|--------------------------|-------------------------|
| No                              | 61,599 (99.8) | 134 (0.2) | 1                        | -                       |
| Yes                             | 41,981 (99.7) | 108 (0.3) | 1.2 (0.9-1.5)            | -                       |
| Received partner notification   |               |           |                          |                         |
| No                              | 67,817 (99.8) | 129 (0.2) | 1                        | 1                       |
| Yes                             | 34,347 (33.2) | 23 (9.5)  | <b>0.4 (0.2-0.5)</b>     | <b>0.5 (0.3-0.8)</b>    |
| Yes, notified for HIV/syphilis  | 1,416 (1.4)   | 90 (37.2) | <b>33.4 (25.3-43.9)</b>  | <b>18.3 (13.2-25.2)</b> |
| Reported STI symptoms           |               |           |                          |                         |
| No                              | 58,360 (99.8) | 94 (0.2)  | 1                        | 1                       |
| Yes, overall STI symptoms       | 44,727 (99.8) | 78 (0.2)  | 1.1 (0.8-1.5)            | 1.3 (1.0-1.8)           |
| Yes, HIV/syphilis symptoms      | 493 (87.6)    | 70 (12.4) | <b>88.2 (63.7-121.4)</b> | <b>34.9 (24.1-50.2)</b> |
| Partner in risk group**         |               |           |                          |                         |
| No                              | 55,690 (99.8) | 134 (0.2) | 1                        | -                       |
| Yes                             | 47,890 (99.8) | 108 (0.2) | 0.9 (0.7-1.2)            | -                       |
| Client of commercial sex worker |               |           |                          |                         |
| No                              | 89,374 (99.8) | 209 (0.2) | 1                        | -                       |
| Yes, in past 6 months           | 6,356 (99.6)  | 23 (0.4)  | 1.5 (1.0-2.3)            | -                       |
| Unknown                         | 7,850 (99.9)  | 10 (0.1)  | 0.5 (0.3-1.0)            | -                       |

Bold = <0.05.

OR, Odds Ratio; CT, chlamydia; GO, gonorrhoea; SYPH, syphilis; STI, sexually transmitted infections.

\* Consultations with missing values <5% on at least one of the determinants were excluded from the analyses.

† Low/middle level of education: no education, elementary school, lbo, mavo, vmbo, mbo-1, havo, vwo, gymnasium. High level education: all other education levels.

‡ Before 2018, condom use was asked regarding last sexual contact. In 2018 this changed to the past 6 months and during vaginal and/or anal sex.

§ STI/HIV-endemic areas include Asia, Africa, the Dutch Caribbean islands, Middle and South America.

\*\* For heterosexual men: partner originating from a high STI/HIV endemic region. For women: partner originating from a high STI/HIV endemic region or a male partner who had sex with men.

**Table 3** Number of missed HIV and/or syphilis diagnoses in targeted test options among women and heterosexual men aged >25 years visiting Dutch sexual health services between 2015-2021

| Scenario                                                                                               | Targeted testing                                                                                                                                                                                                                 | Consultations tested for HIV and/or syphilis | Diagnosed HIV and/or syphilis in total 2015-2021 |                   | Missed HIV and/or syphilis diagnoses in total 2015-2021 |                   | Missed HIV and/or syphilis diagnoses on average per year |               |
|--------------------------------------------------------------------------------------------------------|----------------------------------------------------------------------------------------------------------------------------------------------------------------------------------------------------------------------------------|----------------------------------------------|--------------------------------------------------|-------------------|---------------------------------------------------------|-------------------|----------------------------------------------------------|---------------|
|                                                                                                        |                                                                                                                                                                                                                                  | n (%)                                        | HIV<br>n (%)                                     | Syphilis<br>n (%) | HIV<br>n (%)                                            | Syphilis<br>n (%) | HIV<br>n                                                 | Syphilis<br>n |
| <b>Based on significant determinants predictive for HIV/syphilis</b>                                   |                                                                                                                                                                                                                                  |                                              |                                                  |                   |                                                         |                   |                                                          |               |
| 1                                                                                                      | Reported HIV/syphilis symptoms (1)                                                                                                                                                                                               | 611 (0.6)                                    | 4 (4.9)                                          | 77 (41.8)         | 78 (95.1)                                               | 107 (58.2)        | 11                                                       | 15            |
| 2                                                                                                      | Reported HIV/syphilis symptoms (1) and/or consultations of persons who received partner notification for HIV/syphilis (2)                                                                                                        | 2,125 (1.9)                                  | 30 (36.6)                                        | 119 (64.7)        | 52 (63.4)                                               | 65 (35.3)         | 7                                                        | 9             |
| 3                                                                                                      | Reported HIV/syphilis symptoms (1), consultations of persons who received partner notification for HIV/syphilis (2) and/or aged >30 years (3)                                                                                    | 59,451 (54.5)                                | 71 (86.6)                                        | 163 (88.6)        | 11 (13.4)                                               | 21 (11.4)         | 2                                                        | 3             |
| <b>Based on additional significant determinants predictive for HIV and syphilis in separate models</b> |                                                                                                                                                                                                                                  |                                              |                                                  |                   |                                                         |                   |                                                          |               |
| 4                                                                                                      | Reported HIV/syphilis symptoms (1), consultations of persons who received partner notification for HIV/syphilis (2), aged >30 years (3), self-reported STI in past year (4) and/or originating from an STI/HIV-endemic area* (5) | 80,964 (74.2)                                | 80 (97.6)                                        | 171 (92.9)        | 2 (2.4)                                                 | 13 (7.1)          | 0.3                                                      | 2             |
| Total number of consultations, 2015-2021                                                               |                                                                                                                                                                                                                                  | 109,122 (100)                                | 82 (100)                                         | 184 (100)         |                                                         |                   |                                                          |               |
| STI, sexually transmitted infections.                                                                  |                                                                                                                                                                                                                                  |                                              |                                                  |                   |                                                         |                   |                                                          |               |
| * STI/HIV-endemic areas include Asia, Africa, the Dutch Caribbean islands, Middle and South America.   |                                                                                                                                                                                                                                  |                                              |                                                  |                   |                                                         |                   |                                                          |               |

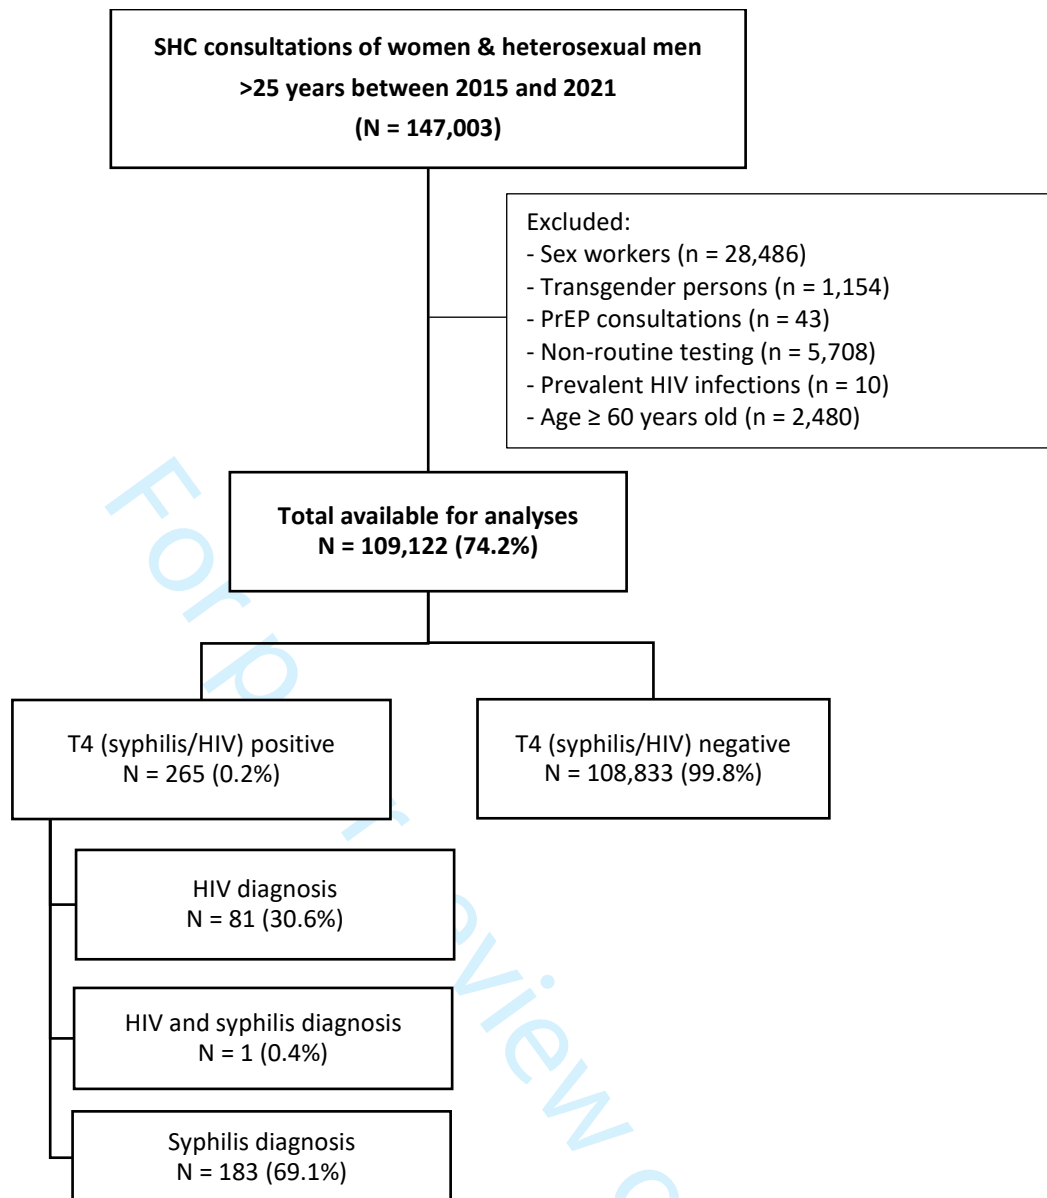

**Figure 1** Flowchart of the included consultations in the study population.

SHC, Sexual Health Center; T4, tested for chlamydia, gonorrhoea, syphilis and HIV.

**Supplemental table S1.** Determinants for an HIV and/or syphilis diagnosis among women and heterosexual men aged >25 years visiting Dutch sexual health services between 2015-2021, stratified by STI symptoms

|                                              | Overall model<br>Adjusted OR (95% CI) | No reported STI symptoms<br>Adjusted OR (95% CI) | Reported STI symptoms -<br>overall<br>Adjusted OR (95% CI) | Reported STI symptoms -<br>HIV/syphilis specific<br>Adjusted OR (95% CI) |
|----------------------------------------------|---------------------------------------|--------------------------------------------------|------------------------------------------------------------|--------------------------------------------------------------------------|
| Total number of HIV and/or SYPH positive     | 242                                   | 94                                               | 78                                                         | 70                                                                       |
| Total number of consultations*               | 103,822                               | 58,454                                           | 44,805                                                     | 563                                                                      |
| Sex                                          |                                       |                                                  |                                                            |                                                                          |
| Women                                        | 1                                     | 1                                                | 1                                                          | 1                                                                        |
| Men                                          | <b>2.2 (1.6-3.0)</b>                  | 1.6 (1.0-2.4)                                    | <b>2.3 (1.4-3.9)</b>                                       | <b>2.5 (1.3-5.0)</b>                                                     |
| Age                                          |                                       |                                                  |                                                            |                                                                          |
| 26-29 years                                  | 1                                     | 1                                                | 1                                                          | 1                                                                        |
| 30+ years                                    | <b>1.8 (1.3-2.5)</b>                  | 1.7 (1.0-2.9)                                    | 1.6 (1.0-2.7)                                              | 1.9 (1.0-3.7)                                                            |
| CT and/or GO positivity at same consultation |                                       |                                                  |                                                            |                                                                          |
| No                                           | -                                     | -                                                | -                                                          | -                                                                        |
| Yes                                          | -                                     | -                                                | -                                                          | -                                                                        |
| Self-reported GO/CT/SYPH in past year        |                                       |                                                  |                                                            |                                                                          |
| No                                           | -                                     | -                                                | -                                                          | 1                                                                        |
| Yes                                          | -                                     | -                                                | -                                                          | <b>4.2 (2.0-8.5)</b>                                                     |
| Education level†                             |                                       |                                                  |                                                            |                                                                          |
| High                                         | 1                                     | 1                                                | 1                                                          | 1                                                                        |
| Low/middle                                   | <b>2.8 (2.0-4.0)</b>                  | <b>2.3 (1.4-3.8)</b>                             | <b>3.9 (2.2-7.3)</b>                                       | <b>2.5 (1.4-4.8)</b>                                                     |
| Unknown/other                                | <b>4.2 (2.7-6.4)</b>                  | <b>3.9 (2.1-7.1)</b>                             | <b>5.3 (2.4-11.6)</b>                                      | <b>2.5 (1.0-6.0)</b>                                                     |
| Number of sex partners in past six months    |                                       |                                                  |                                                            |                                                                          |
| 0-1                                          | 1                                     | 1                                                | 1                                                          | -                                                                        |
| 2-3                                          | <b>0.7 (0.5-0.9)</b>                  | <b>0.4 (0.3-0.7)</b>                             | 1.0 (0.6-1.7)                                              | -                                                                        |

|                                        |                         |                         |                         |                      |
|----------------------------------------|-------------------------|-------------------------|-------------------------|----------------------|
| 4+                                     | <b>0.4 (0.3-0.6)</b>    | <b>0.3 (0.2-0.6)</b>    | <b>0.4 (0.2-0.8)</b>    | -                    |
| Condom use‡                            |                         |                         |                         |                      |
| No                                     | 1                       | -                       | -                       | 1                    |
| Yes                                    | <b>0.6 (0.4-0.9)</b>    | -                       | -                       | 0.4 (0.2-1.0)        |
| Originating from STI/HIV-endemic area§ |                         |                         |                         |                      |
| No                                     | -                       | -                       | -                       | -                    |
| Yes                                    | -                       | -                       | -                       | -                    |
| Received partner notification          |                         |                         |                         |                      |
| No                                     | 1                       | 1                       | 1                       | 1                    |
| Yes                                    | <b>0.5 (0.3-0.8)</b>    | 0.7 (0.4-1.3)           | 0.6 (0.3-1.1)           | 0.2 (0.0-1.0)        |
| Yes, notified for HIV/syphilis         | <b>18.3 (13.2-25.2)</b> | <b>30.7 (19.4-49.1)</b> | <b>37.7 (20.3-66.6)</b> | <b>4.1 (2.2-7.6)</b> |
| Partner in risk group**                |                         |                         |                         |                      |
| No                                     | -                       | -                       | -                       | -                    |
| Yes                                    | -                       | -                       | -                       | -                    |
| Client of commercial sex worker        |                         |                         |                         |                      |
| No                                     | -                       | -                       | -                       | -                    |
| Yes, in past 6 months                  | -                       | -                       | -                       | -                    |
| Unknown                                | -                       | -                       | -                       | -                    |

Bold = <0.05.

OR, Odds Ratio; CT, chlamydia; GO, gonorrhoea; SYPH, syphilis; STI, sexually transmitted infections.

\* Consultations with missing values <5% on at least one of the determinants were excluded from the analyses.

† Low/middle level of education: no education, elementary school, lbo, mavo, vmbo, mbo-1, havo, vwo, gymnasium. High level education: all other education levels.

‡ Before 2018, condom use was asked regarding last sexual contact. In 2018 this changed to the past 6 months and during vaginal and/or anal sex.

§ STI/HIV-endemic areas include Asia, Africa, the Dutch Caribbean islands, Middle and South America.

\*\* For heterosexual men: partner originating from a high STI/HIV endemic region. For women: partner originating from a high STI/HIV endemic region or a male partner who had sex with men.

**Supplemental table S2.** Determinants for an HIV and/or syphilis diagnosis among women and heterosexual men aged >25 years visiting Dutch sexual health services between 2015-2021, stratified by partner notification

|                                              | Overall model<br>Adjusted OR (95% CI) | No partner notification<br>Adjusted OR (95% CI) | Partner notification - overall<br>Adjusted OR (95% CI) | Partner notification - HIV/syphilis specific<br>Adjusted OR (95% CI) |
|----------------------------------------------|---------------------------------------|-------------------------------------------------|--------------------------------------------------------|----------------------------------------------------------------------|
| Total number of HIV and/or SYPH positive     | 242                                   | 129                                             | 23                                                     | 90                                                                   |
| Total number of consultations*               | 103,822                               | 67,946                                          | 34,370                                                 | 1,506                                                                |
| Sex                                          |                                       |                                                 |                                                        |                                                                      |
| Women                                        | 1                                     | 1                                               | 1                                                      | -                                                                    |
| Men                                          | <b>2.2 (1.6-3.0)</b>                  | <b>2.8 (1.8-4.5)</b>                            | 2.3 (0.9-6.4)                                          | -                                                                    |
| Age                                          |                                       |                                                 |                                                        |                                                                      |
| 26-29 years                                  | 1                                     | 1                                               | -                                                      | -                                                                    |
| 30+ years                                    | <b>1.8 (1.3-2.5)</b>                  | <b>1.7 (1.2-2.7)</b>                            | -                                                      | -                                                                    |
| CT and/or GO positivity at same consultation |                                       |                                                 |                                                        |                                                                      |
| No                                           | -                                     | -                                               | -                                                      | 1                                                                    |
| Yes                                          | -                                     | -                                               | -                                                      | <b>2.3 (1.1-4.5)</b>                                                 |
| Self-reported GO/CT/SYPH in past year        |                                       |                                                 |                                                        |                                                                      |
| No                                           | -                                     | 1                                               | -                                                      | -                                                                    |
| Yes                                          | -                                     | 1.6 (0.9-2.7)                                   | -                                                      | -                                                                    |
| Education level†                             |                                       |                                                 |                                                        |                                                                      |
| High                                         | 1                                     | 1                                               | 1                                                      | 1                                                                    |
| Low/middle                                   | <b>2.8 (2.0-4.0)</b>                  | <b>2.6 (1.7-4.1)</b>                            | <b>2.8 (1.2-7.2)</b>                                   | <b>3.5 (2.0-6.7)</b>                                                 |
| Unknown/other                                | <b>4.2 (2.7-6.4)</b>                  | <b>4.2 (2.5-7.2)</b>                            | 1.4 (0.1-7.8)                                          | <b>4.8 (2.3-10.4)</b>                                                |
| Number of sex partners in past six months    |                                       |                                                 |                                                        |                                                                      |
| 0-1                                          | 1                                     | 1                                               | -                                                      | 1                                                                    |
| 2-3                                          | <b>0.7 (0.5-0.9)</b>                  | <b>0.6 (0.4-0.8)</b>                            | -                                                      | 0.9 (0.5-1.4)                                                        |
| 4+                                           | <b>0.4 (0.3-0.6)</b>                  | <b>0.4 (0.2-0.6)</b>                            | -                                                      | <b>0.4 (0.2-0.7)</b>                                                 |
| Condom use‡                                  |                                       |                                                 |                                                        |                                                                      |
| No                                           | 1                                     | -                                               | -                                                      | 1                                                                    |



|                                        |                         |                          |                         |                       |
|----------------------------------------|-------------------------|--------------------------|-------------------------|-----------------------|
| Yes                                    | <b>0.6 (0.4-0.9)</b>    | -                        | -                       | <b>0.4 (0.2-0.9)</b>  |
| Originating from STI/HIV-endemic area§ |                         |                          |                         |                       |
| No                                     | -                       | -                        | -                       | -                     |
| Yes                                    | -                       | -                        | -                       | -                     |
| Reported STI symptoms                  |                         |                          |                         |                       |
| No                                     | 1                       | 1                        | 1                       | 1                     |
| Yes, overall STI symptoms              | 1.3 (1.0-1.8)           | <b>1.6 (1.1-2.6)</b>     | 1.3 (0.5-3.1)           | 1.6 (0.8-2.8)         |
| Yes, HIV/syphilis symptoms             | <b>34.9 (24.1-50.2)</b> | <b>88.0 (54.5-143.3)</b> | <b>28.9 (1.6-150.0)</b> | <b>9.9 (5.5-17.5)</b> |
| Partner in risk group**                |                         |                          |                         |                       |
| No                                     | -                       | -                        | -                       | 1                     |
| Yes                                    | -                       | -                        | -                       | <b>0.6 (0.3-0.9)</b>  |
| Client of commercial sex worker        |                         |                          |                         |                       |
| No                                     | -                       | 1                        | -                       | 1                     |
| Yes, in past 6 months                  | -                       | 1.4 (0.8-2.4)            | -                       | 0.8 (0.2-2.6)         |
| Unknown                                | -                       | <b>2.6 (1.1-5.3)</b>     | -                       | <b>0.1 (0.0-0.7)</b>  |

Bold = <0.05.

OR, Odds Ratio; CT, chlamydia; GO, gonorrhoea; SYPH, syphilis; STI, sexually transmitted infections.

\* Consultations with missing values <5% on at least one of the determinants were excluded from the analyses.

† Low/middle level of education: no education, elementary school, lbo, mavo, vmbo, mbo-1, havo, vwo, gymnasium. High level education: all other education levels.

‡ Before 2018, condom use was asked regarding last sexual contact. In 2018 this changed to the past 6 months and during vaginal and/or anal sex.

§ STI/HIV-endemic areas include Asia, Africa, the Dutch Caribbean islands, Middle and South America.

\*\* For heterosexual men: partner originating from a high STI/HIV endemic region. For women: partner originating from a high STI/HIV endemic region or a male partner who had sex with men.

**Supplemental table S3.** Sensitivity analyses for determinants for an HIV and/or syphilis diagnosis among women and heterosexual men aged >25 years visiting Dutch sexual health services between 2015-2021

|                                              | Adjusted OR (95% CI) overall model | Adjusted OR (95% CI) HIV infection | Adjusted OR (95% CI) Syphilis infection | Adjusted OR (95% CI) including anal sex, 2016-2021 | Adjusted OR (95% CI) excluding COVID-years, 2015-2019 |
|----------------------------------------------|------------------------------------|------------------------------------|-----------------------------------------|----------------------------------------------------|-------------------------------------------------------|
| Total number of HIV and/or SYPH positive     | 242                                | 74                                 | 169                                     | 210                                                | 165                                                   |
| Total number of consultations*               | 103,822                            | 103,822                            | 103,822                                 | 82,885                                             | 86,223                                                |
| Sex                                          |                                    |                                    |                                         |                                                    |                                                       |
| Women                                        | 1                                  | 1                                  | 1                                       | 1                                                  | 1                                                     |
| Men                                          | <b>2.2 (1.6-3.0)</b>               | <b>2.0 (1.2-3.3)</b>               | <b>2.4 (1.7-3.4)</b>                    | <b>2.5 (1.8-3.5)</b>                               | <b>1.8 (1.3-2.6)</b>                                  |
| Age                                          |                                    |                                    |                                         |                                                    |                                                       |
| 26-29 years                                  | 1                                  | 1                                  | 1                                       | 1                                                  | 1                                                     |
| 30+ years                                    | <b>1.8 (1.3-2.5)</b>               | 1.7 (1.0-3.1)                      | <b>1.9 (1.3-2.8)</b>                    | <b>1.8 (1.3-2.6)</b>                               | 1.4 (1.0-2.1)                                         |
| CT and/or GO positivity at same consultation |                                    |                                    |                                         |                                                    |                                                       |
| No                                           | -                                  | 1                                  | -                                       | -                                                  | 1                                                     |
| Yes                                          | -                                  | 1.7 (0.8-3.0)                      | -                                       | -                                                  | 1.4 (0.9-2.3)                                         |
| Self-reported GO/CT/SYPH in past year        |                                    |                                    |                                         |                                                    |                                                       |
| No                                           | -                                  | 1                                  | 1                                       | 1                                                  | -                                                     |
| Yes                                          | -                                  | 0.4 (0.1-1.1)                      | <b>2.0 (1.2-3.2)</b>                    | 1.5 (0.9-2.4)                                      | -                                                     |
| Education level†                             |                                    |                                    |                                         |                                                    |                                                       |
| High                                         | 1                                  | 1                                  | 1                                       | 1                                                  | 1                                                     |
| Low/middle                                   | <b>2.8 (2.0-4.0)</b>               | <b>2.0 (1.1-3.7)</b>               | <b>3.3 (2.2-4.9)</b>                    | <b>2.4 (1.7-3.5)</b>                               | <b>2.8 (1.9-4.2)</b>                                  |
| Unknown/other                                | <b>4.2 (2.7-6.4)</b>               | <b>5.2 (2.7-10.2)</b>              | <b>3.3 (1.9-5.7)</b>                    | <b>3.9 (2.5-6.1)</b>                               | <b>4.9 (2.9-8.0)</b>                                  |
| Number of sex partners in past six months    |                                    |                                    |                                         |                                                    |                                                       |
| 0-1                                          | 1                                  | 1                                  | 1                                       | 1                                                  | 1                                                     |
| 2-3                                          | <b>0.7 (0.5-0.9)</b>               | <b>0.5 (0.3-0.8)</b>               | 0.9 (0.6-1.3)                           | <b>0.6 (0.4-0.9)</b>                               | 0.7 (0.5-1.0)                                         |
| 4+                                           | <b>0.4 (0.3-0.6)</b>               | <b>0.3 (0.1-0.6)</b>               | <b>0.5 (0.3-0.8)</b>                    | <b>0.4 (0.3-0.6)</b>                               | <b>0.4 (0.3-0.6)</b>                                  |

|                                        |                         |                         |                         |                         |                         |
|----------------------------------------|-------------------------|-------------------------|-------------------------|-------------------------|-------------------------|
| Condom use†                            |                         |                         |                         |                         |                         |
| No                                     | 1                       | -                       | 1                       | -                       | -                       |
| Yes                                    | <b>0.6 (0.4-0.9)</b>    | -                       | 0.6 (0.4-1.0)           | -                       | -                       |
| Originating from STI/HIV-endemic area§ |                         |                         |                         |                         |                         |
| No                                     | -                       | 1                       | 1                       | -                       | -                       |
| Yes                                    | -                       | <b>3.1 (1.8-5.4)</b>    | <b>0.5 (0.3-0.7)</b>    | -                       | -                       |
| Received partner notification          |                         |                         |                         |                         |                         |
| No                                     | 1                       | 1                       | 1                       | 1                       | 1                       |
| Yes                                    | <b>0.5 (0.3-0.8)</b>    | 0.7 (0.3-1.3)           | <b>0.4 (0.2-0.7)</b>    | <b>0.4 (0.2-0.6)</b>    | 0.6 (0.3-1.0)           |
| Yes, notified for HIV/syphilis         | <b>18.3 (13.2-25.2)</b> | <b>23.4 (13.7-39.3)</b> | <b>17.4 (11.6-25.8)</b> | <b>15.4 (10.9-21.8)</b> | <b>20.4 (13.7-30.1)</b> |
| Reported STI symptoms                  |                         |                         |                         |                         |                         |
| No                                     | 1                       | -                       | 1                       | 1                       | 1                       |
| Yes, overall STI symptoms              | 1.3 (1.0-1.8)           | -                       | <b>1.9 (1.3-2.9)</b>    | 1.2 (0.9-1.7)           | 1.3 (0.9-2.0)           |
| Yes, HIV/syphilis symptoms             | <b>34.9 (24.1-50.2)</b> | -                       | <b>64.4 (41.9-99.6)</b> | <b>30.7 (21.0-44.7)</b> | <b>36.6 (23.1-57.4)</b> |
| Partner in risk group**                |                         |                         |                         |                         |                         |
| No                                     | -                       | -                       | -                       | -                       | -                       |
| Yes                                    | -                       | -                       | -                       | -                       | -                       |
| Client of commercial sex worker        |                         |                         |                         |                         |                         |
| No                                     | -                       | -                       | -                       | -                       | -                       |
| Yes, in past 6 months                  | -                       | -                       | -                       | -                       | -                       |
| Unknown                                | -                       | -                       | -                       | -                       | -                       |
| Anal sex in past 6 months              |                         |                         |                         |                         |                         |
| No                                     | NA                      | NA                      | NA                      | 1                       | NA                      |
| Yes, either insertive and/or receptive | NA                      | NA                      | NA                      | <b>1.6 (1.1-2.2)</b>    | NA                      |
| Unknown                                | NA                      | NA                      | NA                      | 1.1 (0.6-1.9)           | NA                      |

Bold = <0.05.

OR, Odds Ratio; CT, chlamydia; GO, gonorrhoea; SYPH, syphilis; STI, sexually transmitted infections; NA, not available.

\* Consultations with missing values <5% on at least one of the determinants were excluded from the analyses.

† Low/middle level of education: no education, elementary school, lbo, mavo, vmbo, mbo-1, havo, vwo, gymnasium. High level education: all other education levels.

1  
2  
3 ‡ Before 2018, condom use was asked regarding last sexual contact. In 2018 this changed to the past 6 months and during vaginal and/or anal sex.

4 § STI/HIV-endemic areas include Asia, Africa, the Dutch Caribbean islands, Middle and South America.

5 \*\* For heterosexual men: partner originating from a high STI/HIV endemic region. For women: partner originating from a high STI/HIV endemic region or a male partner who had sex with  
6 men.  
7  
8  
9  
10  
11  
12  
13  
14  
15  
16  
17  
18  
19  
20  
21  
22  
23  
24  
25  
26  
27  
28  
29  
30  
31  
32  
33  
34  
35  
36  
37  
38  
39  
40  
41  
42  
43  
44  
45  
46

For peer review only

STROBE Statement—Checklist of items that should be included in reports of *cross-sectional studies*

|                              | Item No                                                                            | Recommendation                                                                                                                                                                                               | Page No      |
|------------------------------|------------------------------------------------------------------------------------|--------------------------------------------------------------------------------------------------------------------------------------------------------------------------------------------------------------|--------------|
| <b>Title and abstract</b>    | 1                                                                                  | (a) Indicate the study's design with a commonly used term in the title or the abstract                                                                                                                       | 2            |
|                              |                                                                                    | (b) Provide in the abstract an informative and balanced summary of what was done and what was found                                                                                                          | 2            |
| <b>Introduction</b>          |                                                                                    |                                                                                                                                                                                                              |              |
| Background/rationale         | 2                                                                                  | Explain the scientific background and rationale for the investigation being reported                                                                                                                         | 4            |
| Objectives                   | 3                                                                                  | State specific objectives, including any prespecified hypotheses                                                                                                                                             | 4            |
| <b>Methods</b>               |                                                                                    |                                                                                                                                                                                                              |              |
| Study design                 | 4                                                                                  | Present key elements of study design early in the paper                                                                                                                                                      | 4            |
| Setting                      | 5                                                                                  | Describe the setting, locations, and relevant dates, including periods of recruitment, exposure, follow-up, and data collection                                                                              | 4-5          |
| Participants                 | 6                                                                                  | (a) Give the eligibility criteria, and the sources and methods of selection of participants                                                                                                                  | 5            |
| Variables                    | 7                                                                                  | Clearly define all outcomes, exposures, predictors, potential confounders, and effect modifiers. Give diagnostic criteria, if applicable                                                                     | 5            |
| Data sources/<br>measurement | 8*                                                                                 | For each variable of interest, give sources of data and details of methods of assessment (measurement). Describe comparability of assessment methods if there is more than one group                         | 4-5          |
| Bias                         | 9                                                                                  | Describe any efforts to address potential sources of bias                                                                                                                                                    | 5            |
| Study size                   | 10                                                                                 | Explain how the study size was arrived at                                                                                                                                                                    | 5            |
| Quantitative variables       | 11                                                                                 | Explain how quantitative variables were handled in the analyses. If applicable, describe which groupings were chosen and why                                                                                 | 5            |
| Statistical methods          | 12                                                                                 | (a) Describe all statistical methods, including those used to control for confounding                                                                                                                        | 5-6          |
|                              |                                                                                    | (b) Describe any methods used to examine subgroups and interactions                                                                                                                                          | 6            |
|                              | (c) Explain how missing data were addressed                                        | 5                                                                                                                                                                                                            |              |
|                              | (d) If applicable, describe analytical methods taking account of sampling strategy | -                                                                                                                                                                                                            |              |
|                              | (e) Describe any sensitivity analyses                                              | 6                                                                                                                                                                                                            |              |
| <b>Results</b>               |                                                                                    |                                                                                                                                                                                                              |              |
| Participants                 | 13*                                                                                | (a) Report numbers of individuals at each stage of study—eg numbers potentially eligible, examined for eligibility, confirmed eligible, included in the study, completing follow-up, and analysed            | 6            |
|                              |                                                                                    | (b) Give reasons for non-participation at each stage                                                                                                                                                         | 6            |
|                              |                                                                                    | (c) Consider use of a flow diagram                                                                                                                                                                           | 6            |
| Descriptive data             | 14*                                                                                | (a) Give characteristics of study participants (eg demographic, clinical, social) and information on exposures and potential confounders                                                                     | 7 &<br>14-16 |
|                              |                                                                                    | (b) Indicate number of participants with missing data for each variable of interest                                                                                                                          | 14-16        |
| Outcome data                 | 15*                                                                                | Report numbers of outcome events or summary measures                                                                                                                                                         | 15-16        |
| Main results                 | 16                                                                                 | (a) Give unadjusted estimates and, if applicable, confounder-adjusted estimates and their precision (eg, 95% confidence interval). Make clear which confounders were adjusted for and why they were included | 7 &<br>15-16 |

|                          |    |                                                                                                                                                                            |      |
|--------------------------|----|----------------------------------------------------------------------------------------------------------------------------------------------------------------------------|------|
|                          |    | (b) Report category boundaries when continuous variables were categorized                                                                                                  | -    |
|                          |    | (c) If relevant, consider translating estimates of relative risk into absolute risk for a meaningful time period                                                           | -    |
| Other analyses           | 17 | Report other analyses done—eg analyses of subgroups and interactions, and sensitivity analyses                                                                             | 7-8  |
| <b>Discussion</b>        |    |                                                                                                                                                                            |      |
| Key results              | 18 | Summarise key results with reference to study objectives                                                                                                                   | 8    |
| Limitations              | 19 | Discuss limitations of the study, taking into account sources of potential bias or imprecision. Discuss both direction and magnitude of any potential bias                 | 8-9  |
| Interpretation           | 20 | Give a cautious overall interpretation of results considering objectives, limitations, multiplicity of analyses, results from similar studies, and other relevant evidence | 9-10 |
| Generalisability         | 21 | Discuss the generalisability (external validity) of the study results                                                                                                      | 10   |
| <b>Other information</b> |    |                                                                                                                                                                            |      |
| Funding                  | 22 | Give the source of funding and the role of the funders for the present study and, if applicable, for the original study on which the present article is based              | 11   |

\*Give information separately for exposed and unexposed groups.

**Note:** An Explanation and Elaboration article discusses each checklist item and gives methodological background and published examples of transparent reporting. The STROBE checklist is best used in conjunction with this article (freely available on the Web sites of PLoS Medicine at <http://www.plosmedicine.org/>, Annals of Internal Medicine at <http://www.annals.org/>, and Epidemiology at <http://www.epidem.com/>). Information on the STROBE Initiative is available at [www.strobe-statement.org](http://www.strobe-statement.org).

# BMJ Open

## HIV and syphilis testing for women and heterosexual men aged above 25 years in the Netherlands: possibilities for targeted testing at Sexual Health Centers

|                                 |                                                                                                                                                                                                                                                                                                                                                                                                                                                                                                                                                                                                                                                |
|---------------------------------|------------------------------------------------------------------------------------------------------------------------------------------------------------------------------------------------------------------------------------------------------------------------------------------------------------------------------------------------------------------------------------------------------------------------------------------------------------------------------------------------------------------------------------------------------------------------------------------------------------------------------------------------|
| Journal:                        | <i>BMJ Open</i>                                                                                                                                                                                                                                                                                                                                                                                                                                                                                                                                                                                                                                |
| Manuscript ID                   | bmjopen-2023-072862.R1                                                                                                                                                                                                                                                                                                                                                                                                                                                                                                                                                                                                                         |
| Article Type:                   | Original research                                                                                                                                                                                                                                                                                                                                                                                                                                                                                                                                                                                                                              |
| Date Submitted by the Author:   | 01-Aug-2023                                                                                                                                                                                                                                                                                                                                                                                                                                                                                                                                                                                                                                    |
| Complete List of Authors:       | Willemstein, Inge; National Institute for Public Health and the Environment, Centre for Infectious Disease Control<br>Götz, Hannelore ; National Institute for Public Health and the Environment, Centre for Infectious Disease Control; GGD Rotterdam-Rijnmond, Department of Public Health<br>Visser, Maartje; National Institute for Public Health and the Environment, Centre for Infectious Disease Control<br>Heijne, Janneke; National Institute for Public Health and the Environment, Centre for Infectious Disease Control; Maastricht University, Department of Social Medicine, Care and Public Health Research Institute (CAPHRI) |
| <b>Primary Subject Heading</b>: | Sexual health                                                                                                                                                                                                                                                                                                                                                                                                                                                                                                                                                                                                                                  |
| Secondary Subject Heading:      | Epidemiology, Public health, Health policy, Health services research                                                                                                                                                                                                                                                                                                                                                                                                                                                                                                                                                                           |
| Keywords:                       | Health policy < HEALTH SERVICES ADMINISTRATION & MANAGEMENT, Epidemiology < TROPICAL MEDICINE, Sexually Transmitted Disease, HIV & AIDS < INFECTIOUS DISEASES, Syphilis, PUBLIC HEALTH                                                                                                                                                                                                                                                                                                                                                                                                                                                         |
|                                 |                                                                                                                                                                                                                                                                                                                                                                                                                                                                                                                                                                                                                                                |

SCHOLARONE™  
Manuscripts



I, the Submitting Author has the right to grant and does grant on behalf of all authors of the Work (as defined in the below author licence), an exclusive licence and/or a non-exclusive licence for contributions from authors who are: i) UK Crown employees; ii) where BMJ has agreed a CC-BY licence shall apply, and/or iii) in accordance with the terms applicable for US Federal Government officers or employees acting as part of their official duties; on a worldwide, perpetual, irrevocable, royalty-free basis to BMJ Publishing Group Ltd ("BMJ") its licensees and where the relevant Journal is co-owned by BMJ to the co-owners of the Journal, to publish the Work in this journal and any other BMJ products and to exploit all rights, as set out in our [licence](#).

The Submitting Author accepts and understands that any supply made under these terms is made by BMJ to the Submitting Author unless you are acting as an employee on behalf of your employer or a postgraduate student of an affiliated institution which is paying any applicable article publishing charge ("APC") for Open Access articles. Where the Submitting Author wishes to make the Work available on an Open Access basis (and intends to pay the relevant APC), the terms of reuse of such Open Access shall be governed by a Creative Commons licence – details of these licences and which [Creative Commons](#) licence will apply to this Work are set out in our licence referred to above.

Other than as permitted in any relevant BMJ Author's Self Archiving Policies, I confirm this Work has not been accepted for publication elsewhere, is not being considered for publication elsewhere and does not duplicate material already published. I confirm all authors consent to publication of this Work and authorise the granting of this licence.



# HIV and syphilis testing for women and heterosexual men aged above 25 years in the Netherlands: possibilities for targeted testing at Sexual Health Centers

Inge JM Willemstein,<sup>1\*</sup> Hannelore M Götz,<sup>1,2,3</sup> Maartje Visser,<sup>1</sup> Janneke CM Heijne.<sup>1,4</sup>

<sup>1</sup> Centre for Infectious Diseases Control, National Institute for Public Health and the Environment, Bilthoven, The Netherlands

<sup>2</sup> Department of Public Health, Municipal Public Health Service Rotterdam-Rijnmond, Rotterdam, The Netherlands

<sup>3</sup> Department of Public Health, Erasmus MC, University Medical Center Rotterdam, Rotterdam, The Netherlands

<sup>4</sup> Department of Social Medicine, Care and Public Health Research Institute (CAPHRI), Maastricht University, Maastricht, The Netherlands

\*Corresponding author: Inge Willemstein, National Institute for Public Health and the Environment,

P.O. Box 1, 3720 BA Bilthoven, The Netherlands. Tel: +316 29 64 69 60, email:

inge.willemstein@rivm.nl

**Article type:** Original research

**Keywords:** HIV; sexually transmitted diseases; Health Policy; epidemiology; Health Services Research

Word count main text: 3,175 words

Abstract: 297 words

References: 28

Figures: 1

Tables: 3

Supplemental tables: 3

## ABSTRACT

### Objectives

Targeted testing policy for HIV/syphilis at Dutch sexual health centers (SHCs) was evaluated for its efficiency in younger heterosexuals but not for heterosexuals  $\geq 25$  years. Currently, all older heterosexuals are tested for HIV/syphilis at SHCs. To explore possibilities for increased efficiency of testing in heterosexuals aged  $>25$  years, this study aimed to identify determinants of HIV and syphilis diagnoses that could be used in targeted testing strategies.

### Design

An observational study using surveillance data from all Dutch SHC.

### Participants

Women and heterosexual men aged  $>25$  years visiting SHC between 2015-2021.

### Primary and secondary outcome measures

The primary outcome was HIV/syphilis diagnosis, determinants of a diagnosis were analyzed. Based on these determinants and their applicability in SHC practice, different targeted testing scenarios were evaluated. For each scenario, the percentage of consultations involving HIV and syphilis testing and the total amount of missed HIV and syphilis diagnoses were calculated.

### Results

109,122 consultations were included among 75,718 individuals. The strongest determinants of HIV/syphilis diagnosis were HIV/syphilis-specific symptoms (aOR 34.9(24.1-50.2)) and receiving partner notification (aOR 18.3(13.2-25.2)), followed by low/middle education level (aOR 2.8(2.0-4.0)), male sex (aOR 2.2(1.6-3.0)) and age  $\geq 30$  years (aOR 1.8(1.3-2.5)). When applying feasible determinants to targeted testing scenarios, HIV/syphilis testing would have been conducted in 54.5% of all consultations, missing 2 HIV and 3 syphilis diagnoses annually (13.4% and 11.4% of all diagnoses, respectively). In the scenario with the lowest number of missed HIV/syphilis diagnoses (0.3 HIV and 2 syphilis diagnoses annually), HIV/syphilis testing would have been conducted in 74.2% of all consultations.

### Conclusions

In any targeted testing scenario studied, HIV and/or syphilis diagnoses would have been missed. This raises the question whether it is acceptable to put any of these scenarios into practice. This study contributes to a discussion about the impact of targeted testing policy.

**STRENGTHS AND LIMITATIONS OF THIS STUDY**

- This is the first study in the Netherlands describing determinants of HIV/syphilis diagnosis among women and heterosexual men aged >25 years.
- The study used nation-wide surveillance data from Sexual Health Centers.
- This study was limited by the sexual behavioral variables available in the surveillance data.
- Additional cost-effectiveness analyses are needed to facilitate informed decisions regarding HIV/syphilis testing policy.

For peer review only

## 1 INTRODUCTION

2 In many countries, sexually transmitted infections (STI) testing guidelines for women and heterosexual  
3 men aged >25 years are different from testing guidelines for those aged <25 years old. This is mainly  
4 the case for *Chlamydia trachomatis* (chlamydia) and *Neisseria gonorrhoeae* (gonorrhoea), where  
5 testing in women and heterosexual men aged  $\geq 25$  years is often recommended at certain indications  
6 only.(1, 2, 3) However, for syphilis and HIV differentiation in testing guidelines based on age is often  
7 not described. According to CDC, HIV screening should be offered to all individuals who seek care at  
8 Sexual Health Centers (SHCs) and syphilis screening to individuals at increased risk.(1) According to  
9 IUSTI guidelines (contributed by ECDC and the European Office of the WHO), both HIV and syphilis  
10 tests should be offered to all SHC attendees.(4, 5)

11 In the Netherlands, all women and heterosexual men aged <25 years are eligible for testing at  
12 SHCs. Women and heterosexual men aged  $\geq 25$  years are eligible for testing at SHCs if they meet at  
13 least one of the following triage criteria: notified by a sexual contact, STI symptoms, having had a STI  
14 in the past year, female partner of MSM, commercial sex workers (CSW), originating from or having a  
15 partner from a STI-endemic area, or being a victim of sexual violence.(6) This older heterosexual group  
16 is routinely tested for four STI (chlamydia, gonorrhoea, HIV and syphilis) while women and  
17 heterosexual men aged <25 years are only tested for HIV and syphilis on indication.(6, 7) This  
18 restrictive testing among young heterosexuals was introduced to decrease costs, as government  
19 funding for SHCs changed. Evaluation of this testing policy was conducted,(8) and targeted testing of  
20 HIV and syphilis on indication was found to be cost-effective; approximately 3 HIV and 7 syphilis  
21 diagnoses were missed annually. Nevertheless, evaluation data of STI testing for older heterosexuals  
22 remains limited.

23 For older women and heterosexual men, more insight is needed in the characteristics of SHC  
24 visitors with HIV and syphilis diagnoses, in order to explore possibilities for targeted testing in this  
25 group as well. Therefore, the objective of this study was to identify determinants of HIV and syphilis  
26 diagnoses among all STI clinic consultations of women and heterosexual men aged above 25 years  
27 that could possibly be used in targeted testing strategies.

28

## 29 METHODS

### 30 Study population

31 National surveillance data of Sexual Health Centers (SHCs) in the Netherlands (SOAP) of women and  
32 heterosexual men aged above 25 years were used for this study. Consultations were selected from

1  
2  
3 33 2015 to 2021, as in 2015 government funding for SHC testing policy changed and consequently the  
4 34 characteristics of people visiting the SHCs.(9) All women were included and heterosexual men were  
5 35 defined as men with self-reported sexual contact with women only in the past 6 months. Men who  
6 36 had sex with both men and women and men with unknown sexual behavior were excluded. Age was  
7 37 calculated by subtracting birth year (date was not available) from consultation year. To prevent  
8 38 misclassification of 25 year-olds in the study population (who have different testing guidelines),  
9 39 people aged 26 years and older were selected. Consultations were excluded for 1) individuals with  
10 40 specific testing policies (e.g. sex workers, transgender persons, pre-exposure prophylaxis (PrEP)), 2)  
11 41 consultations which did not include routine practice (not tested for chlamydia, gonorrhoea, syphilis  
12 42 and HIV)(6), 3) consultations of people living with HIV and 4) consultations of individuals aged  $\geq 60$   
13 43 years due to small numbers.

#### 22 44 **Definitions**

25 45 The outcome of this study was a diagnosis of HIV and/or syphilis (infectious syphilis, being  
26 46 primary/secondary syphilis or syphilis latens recens). Both STI were combined in one dichotomous  
27 47 variable in the main analysis, as HIV and syphilis testing both requires taking a blood sample. Available  
28 48 self-reported demographic and sexual behavioral variables were included in the model as possible  
29 49 determinants of an HIV/syphilis diagnosis. Age was dichotomized into categories 26-29 and  $\geq 30$  to  
30 50 create equally distributed groups. Education level was dichotomized to two categories: low/middle  
31 51 education level (no education, primary education only or vocational education) or high level education  
32 52 (all other education levels). Other variables included were; notified for STI (specifically for HIV/syphilis  
33 53 or another/unspecified STI), STI symptoms (overall and if so, HIV/syphilis specific (e.g. weight loss,  
34 54 fever, ulcers, swollen lymph nodes), originating from an STI-endemic area (based on country of birth  
35 55 of both the individual and parents(10)), partner from risk group (STI-endemic area or MSM), STI  
36 56 (gonorrhoea, chlamydia, syphilis) diagnosis in the past year (persons who were not tested, were tested  
37 57 negative or test results were unknown were categorized as no STI history), number of partners in the  
38 58 past six months, being a client of CSW, having a chlamydia and/or gonorrhoea diagnosis at the same  
39 59 consultation, and condom use. Before 2018 condom use was reported at last sexual contact, after  
40 60 2018 this was reported in the past 6 months at vaginal and/or anal sex; both were combined in one  
41 61 dichotomous variable (always with a condom in the past 6 months/last sex with a condom or not  
42 62 always/never with a condom in the past 6 months/last sex without condom).

#### 55 63 **Statistical analyses**

58 64 Determinants of an HIV/syphilis diagnosis were analyzed using logistic regressions. If missing values  
59 65 within one variable were more than 5% they were included in analyses as a separate category, missing

1  
2  
3 66 values less than 5% were excluded. We first checked whether we had to take into account that one  
4 67 person could be included in the dataset with multiple consultations. The additional value of adding a  
5 68 random intercept on person level to the model was checked by comparing Akaike Information  
6 69 Criterion (AIC) values between the intercept-only model with and without a random intercept. Then,  
7 70 univariate logistic regression analyses were performed for all determinants separately as independent  
8 71 variable and HIV/syphilis diagnosis as dependent variable. Last, all variables were included in a  
9 72 multivariable model constructed based on backward elimination using AIC. For all significant  
10 73 determinants that remained in the final model, effect modification was examined by adding  
11 74 interaction terms to all univariate regressions separately. For any significant effect modifiers stratified  
12 75 analyses were performed.

13 76 Three sensitivity analyses were performed. First, as determinants of an HIV and syphilis  
14 77 diagnosis might be different, separate analyses were performed per STI. Second, the variable anal sex  
15 78 in the past six months was only collected from 2016 onwards, therefore another model was conducted  
16 79 over the years 2016-2021 with anal sex added as a possible determinant.(11, 12, 13, 14) Finally, a  
17 80 model was conducted over the years 2015-2019 to restrict the analysis to pre-COVID-19 years. During  
18 81 the COVID-19 pandemic, STI care in the Netherlands was downscaled, resulting in less and more  
19 82 targeted SHC consultations in 2020 and 2021.(9) All analyses were performed in R (version 4.2.0,  
20 83 packages tidyverse, gtsummary, broom, janitor, lme4).

#### 21 84 **Targeted testing**

22 85 In order to assess possibilities for targeted testing, different scenarios were built up. The scenarios  
23 86 were based on determinants in the final regression model that were also applicable for use in practice.  
24 87 This was also supplemented with determinants of HIV and syphilis from the separate models. For each  
25 88 scenario the percentage of consultations involving HIV/syphilis testing and the total and average per  
26 89 year of missed HIV and syphilis diagnoses between 2015 and 2021 were calculated.

#### 27 90 28 91 **PATIENT AND PUBLIC INVOLVEMENT**

29 92 Patients and/or the public were not involved in the design, or conduct, or reporting, or dissemination  
30 93 plans of this research. Only data from the national surveillance system were used.

31 94

32 95

33 96

## 97 RESULTS

### 98 Study population

99 Between January 2015 and December 2021, 147,003 STI consultations among women and  
100 heterosexual men aged >25 years were registered (figure 1). In total, 37,881 (25.8%) consultations  
101 were excluded due to various reasons including sex work (n = 28,486), transgender persons (n = 1,154),  
102 PrEP consultation (n = 43), non-routine testing (n = 5,708), prevalent HIV infections (n = 10) or age  $\geq$ 60  
103 years (n = 2,480), leaving 109,122 consultations for analysis among 75,718 individuals. In these  
104 consultations, 184 new syphilis diagnoses (0.2%) were reported and 82 HIV diagnoses (0.1%). In one  
105 consultation both syphilis and HIV were diagnosed.

106 In the study population, sex was equally distributed (table 1). Most people had a higher  
107 education level and originated from a non-STI/HIV-endemic area. Chlamydia was the most diagnosed  
108 STI (12.4% of all consultations). The number of consultations per year decreased over time.

### 109 Determinants of HIV and/or syphilis

110 The strongest determinants of HIV/syphilis diagnosis in univariate analyses were HIV/syphilis specific  
111 symptoms and partner notification for HIV/syphilis (table 2). In multivariate analyses these two  
112 remained the strongest determinants (adjusted Odds Ratio (aOR) 34.9; 95% Confidence Interval (CI)  
113 24.1-50.2 and aOR 18.3; 95% CI 13.2-25.2, resp.). Other significant determinants were male sex, being  
114 aged  $\geq$ 30 years and low/middle education level. Persons who used condoms or had two or more sex  
115 partners in the past six months were less likely to have an HIV/syphilis diagnosis. Correcting for  
116 multiple consultations within one person was not necessary as the AIC values of the intercept-only  
117 model with and without a random intercept were approximately equal.

118 STI symptoms and partner notification were found to be significant effect modifiers. In  
119 stratified analyses for STI symptoms (supplemental table S1) the same determinants were found and  
120 the direction of the effects did not change. Additionally, self-reported STI in the past year became an  
121 extra determinant for persons with HIV/syphilis-specific symptoms. In stratified analyses for partner  
122 notification (supplemental table S2) the direction of the effects also did not change. However, sex and  
123 age were no determinants anymore and chlamydia/gonorrhoeae diagnosis in the same consultation  
124 became an additional determinant for persons with HIV/syphilis-specific partner notification.

125 In all sensitivity analyses (HIV/syphilis separately, including anal sex and excluding COVID  
126 years) (supplemental table S3) the same determinants and direction of effects were found as the initial  
127 model, except for reported HIV/syphilis symptoms which was not a determinant of HIV diagnosis. An  
128 additional significant determinant of HIV diagnosis was originating from an STI/HIV-endemic area,

1  
2  
3 129 while this was protective for syphilis. For syphilis diagnosis, self-reported STI in the past year was an  
4  
5 130 additional determinant. In analyses including anal sex, anal sex was an additional significant  
6  
7 131 determinant of HIV/syphilis diagnosis. Finally, restricting the analyses to pre-COVID-years made no  
8  
9 132 large differences to the initial model.

### 10 133 **Targeted testing**

11  
12  
13 134 If targeted testing was only applied to SHC consultations who reported HIV/syphilis symptoms (the  
14  
15 135 strongest determinant), in 0.6% of all consultations between 2015 and 2021 HIV/syphilis testing would  
16  
17 136 have been conducted (table 3, scenario 1). Yet 95.1% of HIV diagnoses and 58.2% of syphilis diagnoses  
18  
19 137 would then be missed, which corresponds to 11 and 15 missed diagnoses per year. If notified for  
20  
21 138 HIV/syphilis by a partner would be added as testing criterium (the second most strongest determinant;  
22  
23 140 diagnosing 36.6% of all HIV and 64.7% of all syphilis diagnoses. Other significant determinants were  
24  
25 141 education level, sex and age. Only age was assessed as applicable to SHC practice and age > 30 years  
26  
27 142 was added to scenario 3, resulting in 54.5% of all consultations wherein HIV/syphilis testing would  
28  
29 143 have been conducted resulting in missing 2 HIV and 3 syphilis diagnoses annually. Finally, when adding  
30  
31 144 the separate determinants of HIV and syphilis diagnosis (self-reported STI in the past year and  
32  
33 145 originating from STI/HIV-endemic area; scenario 4), in 74.2% of all consultations HIV/syphilis testing  
34  
35 146 would still have been conducted, missing 0.3 HIV and 2 syphilis diagnoses on average per year.

36 147

### 37 148 **DISCUSSION**

38  
39  
40 149 The strongest determinants of an HIV/syphilis diagnosis in women and heterosexual men aged over  
41  
42 150 25 years visiting SHCs were received partner notification for HIV/syphilis and reported HIV/syphilis  
43  
44 151 symptoms. Persons aged  $\geq 30$  years were also more likely to have an HIV/syphilis diagnosis. When  
45  
46 152 applying these determinants to targeted testing scenarios, HIV/syphilis testing would still have been  
47  
48 153 conducted in 54.5% of all consultations, missing 2 HIV and 3 syphilis diagnoses annually. The scenario  
49  
50 154 that resulted in the lowest number of missed HIV/syphilis diagnoses was when determinants of HIV  
51  
52 155 or syphilis separately were also included, resulting in 0.3 HIV and 2 syphilis diagnoses missed annually.  
53  
54 156 However, only in 26% of all consultations a HIV/syphilis tests would have been omitted between 2015  
55  
56 157 and 2021.

57  
58 158 This is the first study in the Netherlands to describe determinants of an HIV/syphilis  
59  
60 159 diagnosis among women and heterosexual men aged >25 years. By the use of national surveillance  
60 160 data of Sexual Health Centers a large study sample was guaranteed. However, there were some



1  
2  
3 161 limitations. First, we were limited to variables as available in SOAP data. For example, HIV/syphilis-  
4  
5 162 specific symptoms is one combined variable. We do note that clinical symptoms of recent HIV infection  
6  
7 163 and early syphilis infection do overlap, so a clinical distinction would not be possible. More detailed  
8  
9 164 clinical data may have improved the results of the regression model and the application of possible  
10  
11 165 targeted testing scenarios in clinical practice. In addition, SOAP data did not allow to include all  
12  
13 166 variables in the analyses as some questions contained too many missings. Especially victim of sexual  
14  
15 167 violence would have been interesting as it is a HIV/syphilis test criterium for heterosexuals <25 years  
16  
17 168 but could not be included due to too many missings. However, in consultations that did contain  
18  
19 169 information on sexual violence, only one HIV diagnosis was found among victims of sexual violence,  
20  
21 170 so we do not expect that including this variable would have changed our results. Second, HIV and  
22  
23 171 syphilis were included in one combined outcome variable, while one might argue that the main  
24  
25 172 analyses should have been separated in advance. However, as we intended to explore effectiveness  
26  
27 173 of potential STI targeted testing strategies in this study, we think that combined HIV/syphilis testing  
28  
29 174 would be most effective for SHC practice as both HIV and syphilis tests are conducted on a blood  
30  
31 175 sample. Once blood is taken integrated testing for HIV and syphilis is most convenient. Furthermore,  
32  
33 176 since the number of diagnoses were small, combining the two also increased the power. Sensitivity  
34  
35 177 analyses showed different determinants when separating the two. For example, origin from an STI-  
36  
37 178 endemic area was a determinant of HIV only and reported HIV/syphilis symptoms was a strong  
38  
39 179 determinant of syphilis but not for HIV. This could be explained by syphilis symptoms being more often  
40  
41 180 present and more recognizable than HIV symptoms.<sup>(15)</sup> Third, in this study we estimated missed  
42  
43 181 HIV/syphilis diagnoses annually based on numbers of HIV/syphilis diagnoses between 2015-2021 and  
44  
45 182 did not take into account an effect of time to diagnosis. Delayed diagnoses could lead to, for example,  
46  
47 183 delayed healthcare and/or further HIV/syphilis transmission, causing different annual numbers of  
48  
49 184 missed HIV/syphilis diagnoses in reality than estimated in this study. Finally, it should be noted that  
50  
51 185 the results of our study might be different when evaluating future years, based on possible differences  
52  
53 186 in population and/or STI testing policy. Therefore continuous evaluation remains needed. To our  
54  
55 187 knowledge, no other studies have been performed on determinants of both HIV and/or syphilis  
56  
57 188 diagnoses as one outcome, apart from co-infections. For determinants of HIV and syphilis diagnoses  
58  
59 189 separately the targeted populations between studies differ greatly, hampering comparison of our  
60  
190 study results.<sup>(16, 17, 18, 19, 20, 21, 22, 23)</sup> However, determinants in our study consistent with  
191  
192 existing data were partner notification and lower education level, found to be determinants of both  
193  
194 HIV and syphilis<sup>(6, 9, 16, 17, 18)</sup> and STI symptoms and male sex found to be determinants of syphilis  
only.<sup>(6, 19)</sup> Yet an unexpected result in our study was that persons with two or more partners would  
be at decreased risk for HIV/syphilis diagnosis, as multiple partners are usually determinants of STI.<sup>(9,</sup>

1  
2  
3 195 17, 22) This difference could be explained by the strict triage criteria for heterosexuals  $\geq 25$  years at  
4  
5 196 SHC, making this a higher risk group compared to, for example, heterosexuals  $< 25$  years who are all  
6  
7 197 eligible for STI testing. Another explanation for these reversed effects in our study might be by  
8  
9 198 unmeasured variables like reasons for testing.

10  
11 199 Using the determinants of an HIV/syphilis diagnoses, we constructed potential strategies for  
12  
13 200 targeted testing. The testing scenarios were built up based on significant determinants in the model,  
14  
15 201 combined with feasibility in SHC practice. Targeted testing based on sex and education level were  
16  
17 202 considered not feasible as this might lead to discrimination and/or stigmatization. Yet these results do  
18  
19 203 stress the importance of reaching out to persons with low/middle-education level and making sure  
20  
21 204 that STI care at SHC is accessible for this group.(24) The regression model showed that the only  
22  
23 205 outstanding determinants of HIV/syphilis diagnosis were HIV/syphilis specific symptoms and partner  
24  
25 206 notification. Partner notification contributed to approximately half of all HIV/syphilis diagnoses found  
26  
27 207 in our study. This underlines the great potential of partner notification in STI case detection, and  
28  
29 208 stresses the importance of partner notification in STI control. All other determinants in the regression  
30  
31 209 model had odds ratios close to one, meaning that specific risk groups were hard to identify within the  
32  
33 210 group of heterosexuals older than 25 years at SHC. Also, when adding all of these significant  
34  
35 211 determinants to targeted testing, most participants would still have been tested (74%). This raises the  
36  
37 212 question whether you would be able to calling this targeted testing. This might indicate that the  
38  
39 213 current triage criteria for this group to be eligible for STI testing at SHC are effective in finding the  
40  
41 214 persons at higher risk for STI and might need to remain as they are for surveillance purposes. In every  
42  
43 215 targeted scenario evaluated, HIV and/or syphilis diagnoses will be missed. It should be questioned  
44  
45 216 whether it is acceptable in an era of aiming at going towards zero new HIV infections to put any of  
46  
47 217 these targeted testing scenarios into practice. A study on targeted HIV/syphilis testing for  
48  
49 218 heterosexuals  $< 25$  years estimated that 3 missed HIV and 7 missed syphilis diagnoses annually were  
50  
51 219 considered to be limited, when 3,3 million euros could be saved.(8) An evaluation of test cost savings  
52  
53 220 for women and heterosexual men aged  $> 25$  years is needed to make informed decisions. To find the  
54  
55 221 optimal strategy, HIV and syphilis treatment costs should also be included in these evaluations.  
56  
57 222 Additionally, ethical aspects should be considered to decide how many diagnoses are acceptable to  
58  
59 223 be missed. The UNAIDS announced the target to reach zero HIV infections in 2030(25) and STI AIDS  
60  
224 Netherlands also set the aim to reach zero new HIV infections as soon as possible.(15) To reach this,  
225 any missed diagnosis would be too much and timely diagnosis of HIV is necessary. In the Netherlands,  
226 diagnosis of late-stage HIV is more common among women and heterosexual men compared to  
227 MSM(26) and also in the UK it is shown that syphilis often remains undiagnosed, especially among  
228 heterosexual men.(27) Untreated syphilis could lead to latent syphilis with severe neurological and

1  
2  
3 229 cardiovascular damage.(28) Finally, complications of non-detected cases could lead to increased costs,  
4  
5 230 either through treatment of severe disease or additional testing in general practice or hospitals. We  
6  
7 231 recommend all these considerations to be taken into account when assessing targeted testing policy.

8  
9 232 Altogether, this study is a first step in considering targeted testing for HIV and syphilis of  
10  
11 233 women and heterosexual men aged >25 years in the Netherlands. It is indicated that no specific group  
12  
13 234 can be identified for targeted testing without missing any HIV/syphilis diagnoses. A discussion with a  
14  
15 235 multidisciplinary team consisting of public health professionals, policy makers, ethicists, economists,  
16  
17 236 epidemiologists and all others involved about the public health impact of targeted testing policy is  
18  
19 237 needed.

20 238

## 21 239 **ACKNOWLEDGMENTS**

22  
23  
24 240 The authors thank Birgit van Benthem, Susan van den Hof and Jaap van Dissel for their constructive  
25  
26 241 comments on the manuscript. Also, Maarten Schipper is thanked for statistical advice on the analyses.

27  
28 242

## 29 243 **CONTRIBUTORS**

30  
31  
32  
33 244 IW, HG and JCMH designed the study. IW and MV cleaned the data. IW analyzed the data and drafted  
34  
35 245 the manuscript. All authors contributed to the interpretation of the results, commented on the  
36  
37 246 manuscript and approved the final version.

38  
39 247

## 40 248 **FUNDING**

41  
42  
43 249 The author(s) received no financial support for the research, authorship, and/or publication of this  
44  
45 250 article.

46 251

47  
48 252

## 49 253 **COMPETING INTERESTS**

50  
51  
52 254 None declared.

53  
54 255

55  
56 256

57  
58 257

1  
2  
3 258 **ETHICS APPROVAL AND CONSENT TO PARTICIPATE**  
4

5 259 Ethical approval for the study was not necessary following the Dutch Medical Research (involving  
6 Human Subjects) Act, as the study uses routinely collected, anonymous surveillance data (Wet  
7 medisch-wetenschappelijk onderzoek met mensen 1998 §1 artikel 1).  
8  
9 261

10  
11 262  
12

13 263 **DATA AVAILABILITY STATEMENT**  
14

15  
16 264 This study uses data from the Dutch national registration of sexual health centre consultations (SOAP).  
17  
18 265 Data can be requested for scientific use from the SOAP registration committee (contact  
19 soap@rivm.nl).  
20  
21  
22  
23  
24  
25  
26  
27  
28  
29  
30  
31  
32  
33  
34  
35  
36  
37  
38  
39  
40  
41  
42  
43  
44  
45  
46  
47  
48  
49  
50  
51  
52  
53  
54  
55  
56  
57  
58  
59  
60

## REFERENCES

1. Workowski KA, Bachmann LH, Chan PA, et al. Sexually Transmitted Infections Treatment Guidelines, 2021. *MMWR Recomm Rep* 2021;70(4):1-187.
2. Lanjouw E, Ouburg S, de Vries HJ, et al. 2015 European guideline on the management of Chlamydia trachomatis infections. *Int J STD AIDS* 2016;27(5):333-48.
3. Unemo M, Ross J, Serwin AB, et al. 2020 European guideline for the diagnosis and treatment of gonorrhoea in adults. *Int J STD AIDS* 2020;956462420949126.
4. Janier M, Unemo M, Dupin N, et al. 2020 European guideline on the management of syphilis. *J Eur Acad Dermatol Venereol* 2021;35(3):574-88.
5. Gökengin D, Wilson-Davies E, Nazlı Zeka A, et al. 2021 European guideline on HIV testing in genito-urinary medicine settings. *J Eur Acad Dermatol Venereol* 2021;35(5):1043-57.
6. National Institute for Public Health and the Environment (RIVM). [Draaiboek voor Centra Seksuele Gezondheid in de Publieke Gezondheidszorg]. 2022. <https://lci.rivm.nl/draaiboeken/consult-seksuele-gezondheid> (accessed 28 March 2022).
7. Suijkerbuijk AW, Over EA, Koedijk FD, et al. [More efficient testing policy at STI clinics]. *Ned Tijdschr Geneesk* 2014;158:A6980.
8. Suijkerbuijk AWM, Over EAB, van Aar F, et al. Consequences of restricted STI testing for young heterosexuals in the Netherlands on test costs and QALY losses. *Health Policy* 2018;122(2):198-203.
9. van Wees DA, Visser M, van Aar F, et al. Sexually transmitted infections in the Netherlands in 2021. Bilthoven: National Institute for Public Health and the Environment (RIVM), 2022.
10. Statistics Netherlands (CBS). [Migratieachtergrond] [online]. 2022. <https://www.cbs.nl/nl-nl/onze-diensten/methoden/begrippen/migratieachtergrond> (accessed 7 September 2022).
11. Elmes J, Silhol R, Hess KL, et al. Receptive anal sex contributes substantially to heterosexually acquired HIV infections among at-risk women in twenty US cities: Results from a modelling analysis. *Am J Reprod Immunol* 2020;84(2):e13263.
12. O'Leary A, DiNenno E, Honeycutt A, et al. Contribution of Anal Sex to HIV Prevalence Among Heterosexuals: A Modeling Analysis. *AIDS Behav* 2017;21(10):2895-903.
13. Rahman N, Ghanem KG, Gilliams E, et al. Factors associated with sexually transmitted infection diagnosis in women who have sex with women, women who have sex with men and women who have sex with both. *Sex Transm Infect* 2021;97(6):423-28.
14. van Liere G, Dukers-Muijers N, Levels L, et al. High Proportion of Anorectal Chlamydia trachomatis and Neisseria gonorrhoeae After Routine Universal Urogenital and Anorectal Screening in Women Visiting the Sexually Transmitted Infection Clinic. *Clin Infect Dis* 2017;64(12):1705-10.
15. National Institute for Public Health and the Environment (RIVM). [Richtlijnen & Draaiboeken] [online]. 2022. <https://lci.rivm.nl/richtlijnen> (accessed 20 October 2022).
16. Gupta N, Niyas VKM, Nischal N, et al. Epidemiological trends in patients living with human immunodeficiency virus: a 13-year experience from a tertiary care center in India. *Infez Med* 2019;27(3):308-15.
17. Nishiki S, Arima Y, Yamagishi T, et al. Syphilis in heterosexual women: case characteristics and risk factors for recent syphilis infection in Tokyo, Japan, 2017-2018. *Int J STD AIDS* 2020;31(13):1272-81.
18. Hurtado I, Alastrue I, Pavlou M, et al. Increased syphilis trend among patients in an AIDS information and prevention center. *Gac Sanit* 2011;25(5):368-71.
19. Spiteri G, Unemo M, Mårdh O, et al. The resurgence of syphilis in high-income countries in the 2000s: a focus on Europe. *Epidemiol Infect* 2019;147:e143.
20. Erdinc FS, Dokuzoguz B, Unal S, et al. Temporal Trends in the Epidemiology of HIV in Turkey. *Curr HIV Res* 2020;18(4):258-66.
21. Saxton PJW, McAllister SM, Thirkell CE, et al. Population rates of HIV, gonorrhoea and syphilis diagnoses by sexual orientation in New Zealand. *Sex Transm Infect* 2022;98(5):376-79.

- 1  
2  
3 22. Harrington P, Onwubiko U, Qi M, et al. Factors Associated with HIV Seroconversion Among  
4 Women Attending an Urban Health Clinic in the South: A Matched Case-Control Study. *AIDS*  
5 *Patient Care STDS* 2020;34(3):124-31.  
6  
7 23. Chen M, Ma Y, Chen H, et al. Demographic characteristics and spatial clusters of recent HIV-1  
8 infections among newly diagnosed HIV-1 cases in Yunnan, China, 2015. *BMC Public Health*  
9 2019;19(1):1507.  
10  
11 24. Slurink IA, Götz HM, van Aar F, et al. Educational level and risk of sexually transmitted  
12 infections among clients of Dutch sexual health centres. *Int J STD AIDS* 2021;32(11):1004-13.  
13  
14 25. UNAIDS Joint United Nations Programme on HIV/AIDS. Fast-track: ending the AIDS epidemic  
15 by 2030. Geneva: UNAIDS, 2014.  
16  
17 26. van Sighem AI, Wit FWNM, Boyd A, et al. Monitoring Report 2021. Human Immunodeficiency  
18 Virus (HIV) Infection in the Netherlands. Amsterdam: stichting hiv monitoring, 2021.  
19  
20 27. Harvala H, Reynolds C, Fabiana A, et al. Lessons learnt from syphilis-infected blood donors: a  
21 timely reminder of missed opportunities. *Sex Transm Infect* 2022;98(4):293-97.  
22  
23 28. World Health Organization (WHO). [Syphilis][online]. 2022. [https://www.who.int/health-](https://www.who.int/health-topics/syphilis#tab=tab_1)  
24 [topics/syphilis#tab=tab\\_1](https://www.who.int/health-topics/syphilis#tab=tab_1) (accessed 6 July 2023).  
25  
26  
27  
28  
29  
30  
31  
32  
33  
34  
35  
36  
37  
38  
39  
40  
41  
42  
43  
44  
45  
46  
47  
48  
49  
50  
51  
52  
53  
54  
55  
56  
57  
58  
59  
60

## TABLES

**Table 1** Number and percentage of consultations by different characteristics of women and heterosexual men aged >25 years visiting Dutch sexual health centers between 2015 and 2021

|                                        | Consultations |      |
|----------------------------------------|---------------|------|
|                                        | n             | %    |
| Total number of consultations          | 109,122       | 100  |
| Number of individuals                  | 75,718        | 69.4 |
| Consultation number per individual     |               |      |
| 1                                      | 75,718        | 69.4 |
| >1                                     | 33,404        | 30.6 |
| Sex                                    |               |      |
| Men                                    | 54,531        | 50.0 |
| Women                                  | 54,591        | 50.0 |
| Age                                    |               |      |
| 26-29 years                            | 50,287        | 46.1 |
| 30+ years                              | 58,835        | 53.9 |
| Education level*                       |               |      |
| High                                   | 59,453        | 54.5 |
| Low/middle                             | 41,716        | 38.2 |
| Unknown/other                          | 7,953         | 7.3  |
| Originating from STI/HIV-endemic area† |               |      |
| No                                     | 64,782        | 59.4 |
| Yes                                    | 44,234        | 40.5 |
| Unknown                                | 106           | 0.1  |
| STI diagnoses‡                         |               |      |
| Chlamydia                              | 13,539        | 12.4 |
| Gonorrhoea                             | 2,403         | 2.2  |
| Syphilis, infectious§                  | 184           | 0.2  |
| HIV                                    | 82            | 0.1  |
| Year consult                           |               |      |
| 2015                                   | 22,322        | 20.5 |
| 2016                                   | 21,306        | 19.5 |
| 2017                                   | 19,855        | 18.2 |
| 2018                                   | 15,951        | 14.6 |
| 2019                                   | 11,395        | 10.4 |
| 2020                                   | 8,330         | 7.6  |
| 2021                                   | 9,963         | 9.1  |

\* Low/middle level of education: no education, elementary school, lbo, mavo, vmbo, mbo-1, havo, vwo, gymnasium. High level education: all other education levels.

† STI/HIV-endemic areas include Asia, Africa, the Dutch Caribbean islands, Middle and South America.

‡ Consultations could be counted double when multiple STI were found at the same consultation.

§ Infectious syphilis includes primary syphilis, secondary syphilis and syphilis latens recens.

**Table 2** Determinants of an HIV and/or syphilis diagnosis among women and heterosexual men aged >25 years visiting Dutch sexual health centers between 2015-2021

|                                              | HIV and/or syphilis negative<br>n (%) | HIV and/or syphilis positive<br>n (%) | Crude OR (95% CI)     | Adjusted OR (95% CI) |
|----------------------------------------------|---------------------------------------|---------------------------------------|-----------------------|----------------------|
| Total number of consultations*               | 103,580 (99.8)                        | 242 (0.2)                             |                       |                      |
| Sex                                          |                                       |                                       |                       |                      |
| Women                                        | 51,905 (99.8)                         | 84 (0.2)                              | 1                     | 1                    |
| Men                                          | 51,675 (99.7)                         | 158 (0.3)                             | <b>1.9 (1.5-2.5)</b>  | <b>2.2 (1.6-3.0)</b> |
| Age                                          |                                       |                                       |                       |                      |
| 26-29 years                                  | 48,175 (99.9)                         | 58 (0.1)                              | 1                     | 1                    |
| 30+ years                                    | 55,405 (99.7)                         | 184 (0.3)                             | <b>2.8 (2.1-3.7)</b>  | <b>1.8 (1.3-2.5)</b> |
| CT and/or GO positivity at same consultation |                                       |                                       |                       |                      |
| No                                           | 89,023 (99.8)                         | 211 (0.2)                             | 1                     | -                    |
| Yes                                          | 14,557 (99.8)                         | 31 (0.2)                              | 0.90 (0.6-1.3)        | -                    |
| Self-reported GO/CT/SYPH in past year        |                                       |                                       |                       |                      |
| No                                           | 94,871 (99.8)                         | 215 (0.2)                             | 1                     | -                    |
| Yes                                          | 8,709 (99.7)                          | 27 (0.3)                              | 1.4 (0.9-2.0)         | -                    |
| Education level†                             |                                       |                                       |                       |                      |
| High                                         | 57,104 (99.9)                         | 54 (0.1)                              | 1                     | 1                    |
| Low/middle                                   | 39,494 (99.6)                         | 142 (0.4)                             | <b>3.8 (2.8-5.2)</b>  | <b>2.8 (2.0-4.0)</b> |
| Unknown/other                                | 6,982 (99.3)                          | 46 (0.7)                              | <b>7.0 (4.7-10.3)</b> | <b>4.2 (2.7-6.4)</b> |
| Number of sex partners in past six months    |                                       |                                       |                       |                      |
| 0-1                                          | 23,673 (99.6)                         | 107 (0.4)                             | 1                     | 1                    |
| 2-3                                          | 42,110 (99.8)                         | 88 (0.2)                              | <b>0.5 (0.3-0.6)</b>  | <b>0.7 (0.5-0.9)</b> |
| 4+                                           | 37,797 (99.9)                         | 47 (0.1)                              | <b>0.3 (0.2-0.4)</b>  | <b>0.4 (0.3-0.6)</b> |
| Condom use‡                                  |                                       |                                       |                       |                      |
| No                                           | 86,413 (99.8)                         | 214 (0.2)                             | 1                     | 1                    |
| Yes                                          | 17,167 (99.8)                         | 28 (0.2)                              | 0.7 (0.4-1.0)         | <b>0.6 (0.4-0.9)</b> |
| Originating from STI/HIV-endemic area§       |                                       |                                       |                       |                      |



|                                 |               |           |                          |                         |
|---------------------------------|---------------|-----------|--------------------------|-------------------------|
| No                              | 61,599 (99.8) | 134 (0.2) | 1                        | -                       |
| Yes                             | 41,981 (99.7) | 108 (0.3) | 1.2 (0.9-1.5)            | -                       |
| Received partner notification   |               |           |                          |                         |
| No                              | 67,817 (99.8) | 129 (0.2) | 1                        | 1                       |
| Yes                             | 34,347 (33.2) | 23 (9.5)  | <b>0.4 (0.2-0.5)</b>     | <b>0.5 (0.3-0.8)</b>    |
| Yes, notified for HIV/syphilis  | 1,416 (1.4)   | 90 (37.2) | <b>33.4 (25.3-43.9)</b>  | <b>18.3 (13.2-25.2)</b> |
| Reported STI symptoms           |               |           |                          |                         |
| No                              | 58,360 (99.8) | 94 (0.2)  | 1                        | 1                       |
| Yes, overall STI symptoms       | 44,727 (99.8) | 78 (0.2)  | 1.1 (0.8-1.5)            | 1.3 (1.0-1.8)           |
| Yes, HIV/syphilis symptoms      | 493 (87.6)    | 70 (12.4) | <b>88.2 (63.7-121.4)</b> | <b>34.9 (24.1-50.2)</b> |
| Partner in risk group**         |               |           |                          |                         |
| No                              | 55,690 (99.8) | 134 (0.2) | 1                        | -                       |
| Yes                             | 47,890 (99.8) | 108 (0.2) | 0.9 (0.7-1.2)            | -                       |
| Client of commercial sex worker |               |           |                          |                         |
| No                              | 89,374 (99.8) | 209 (0.2) | 1                        | -                       |
| Yes, in past 6 months           | 6,356 (99.6)  | 23 (0.4)  | 1.5 (1.0-2.3)            | -                       |
| Unknown                         | 7,850 (99.9)  | 10 (0.1)  | 0.5 (0.3-1.0)            | -                       |

Bold = <0.05.

OR, Odds Ratio; CT, chlamydia; GO, gonorrhoea; SYPH, syphilis; STI, sexually transmitted infections.

\* Consultations with missing values <5% on at least one of the determinants were excluded from the analyses.

† Low/middle level of education: no education, elementary school, lbo, mavo, vmbo, mbo-1, havo, vwo, gymnasium. High level education: all other education levels.

‡ Before 2018, condom use was asked regarding last sexual contact. In 2018 this changed to the past 6 months and during vaginal and/or anal sex.

§ STI/HIV-endemic areas include Asia, Africa, the Dutch Caribbean islands, Middle and South America.

\*\* For heterosexual men: partner originating from a high STI/HIV endemic region. For women: partner originating from a high STI/HIV endemic region or a male partner who had sex with men.

1  
2  
3  
4  
5  
6  
7  
8  
9  
10  
11  
12  
13  
14  
15  
16  
17  
18  
19  
20  
21  
22  
23  
24  
25  
26  
27  
28  
29  
30  
31  
32  
33  
34  
35  
36  
37  
38  
39  
40  
41  
42  
43  
44  
45  
46

**Table 3** Number of missed HIV and/or syphilis diagnoses in targeted test options among women and heterosexual men aged >25 years visiting Dutch sexual health centers between 2015-2021

| Scenario                                                                                             | Targeted testing                                                                                                                                                                                                                 | Consultations tested for HIV and/or syphilis | Diagnosed HIV and/or syphilis in total 2015-2021 |                | Missed HIV and/or syphilis diagnoses in total 2015-2021 |                | Missed HIV and/or syphilis diagnoses on average per year |            |
|------------------------------------------------------------------------------------------------------|----------------------------------------------------------------------------------------------------------------------------------------------------------------------------------------------------------------------------------|----------------------------------------------|--------------------------------------------------|----------------|---------------------------------------------------------|----------------|----------------------------------------------------------|------------|
|                                                                                                      |                                                                                                                                                                                                                                  | n (%)                                        | HIV n (%)                                        | Syphilis n (%) | HIV n (%)                                               | Syphilis n (%) | HIV n                                                    | Syphilis n |
| <b>Based on significant determinants of HIV/syphilis</b>                                             |                                                                                                                                                                                                                                  |                                              |                                                  |                |                                                         |                |                                                          |            |
| 1                                                                                                    | Reported HIV/syphilis symptoms (1)                                                                                                                                                                                               | 611 (0.6)                                    | 4 (4.9)                                          | 77 (41.8)      | 78 (95.1)                                               | 107 (58.2)     | 11                                                       | 15         |
| 2                                                                                                    | Reported HIV/syphilis symptoms (1) and/or consultations of persons who received partner notification for HIV/syphilis (2)                                                                                                        | 2,125 (1.9)                                  | 30 (36.6)                                        | 119 (64.7)     | 52 (63.4)                                               | 65 (35.3)      | 7                                                        | 9          |
| 3                                                                                                    | Reported HIV/syphilis symptoms (1), consultations of persons who received partner notification for HIV/syphilis (2) and/or aged >30 years (3)                                                                                    | 59,451 (54.5)                                | 71 (86.6)                                        | 163 (88.6)     | 11 (13.4)                                               | 21 (11.4)      | 2                                                        | 3          |
| <b>Based on additional significant determinants of HIV and syphilis in separate models</b>           |                                                                                                                                                                                                                                  |                                              |                                                  |                |                                                         |                |                                                          |            |
| 4                                                                                                    | Reported HIV/syphilis symptoms (1), consultations of persons who received partner notification for HIV/syphilis (2), aged >30 years (3), self-reported STI in past year (4) and/or originating from an STI/HIV-endemic area* (5) | 80,964 (74.2)                                | 80 (97.6)                                        | 171 (92.9)     | 2 (2.4)                                                 | 13 (7.1)       | 0.3                                                      | 2          |
| Total number of consultations, 2015-2021                                                             |                                                                                                                                                                                                                                  | 109,122 (100)                                | 82 (100)                                         | 184 (100)      |                                                         |                |                                                          |            |
| STI, sexually transmitted infections.                                                                |                                                                                                                                                                                                                                  |                                              |                                                  |                |                                                         |                |                                                          |            |
| * STI/HIV-endemic areas include Asia, Africa, the Dutch Caribbean islands, Middle and South America. |                                                                                                                                                                                                                                  |                                              |                                                  |                |                                                         |                |                                                          |            |



**Figure 1** Flowchart of the included consultations in the study population.

SHC, Sexual Health Center; T4, tested for chlamydia, gonorrhoea, syphilis and HIV.

**Supplemental table S1.** Determinants of an HIV and/or syphilis diagnosis among women and heterosexual men aged >25 years visiting Dutch sexual health centers between 2015-2021, stratified by STI symptoms

|                                              | Overall model<br>Adjusted OR (95% CI) | No reported STI symptoms<br>Adjusted OR (95% CI) | Reported STI symptoms -<br>overall<br>Adjusted OR (95% CI) | Reported STI symptoms -<br>HIV/syphilis specific<br>Adjusted OR (95% CI) |
|----------------------------------------------|---------------------------------------|--------------------------------------------------|------------------------------------------------------------|--------------------------------------------------------------------------|
| Total number of HIV and/or SYPH positive     | 242                                   | 94                                               | 78                                                         | 70                                                                       |
| Total number of consultations*               | 103,822                               | 58,454                                           | 44,805                                                     | 563                                                                      |
| Sex                                          |                                       |                                                  |                                                            |                                                                          |
| Women                                        | 1                                     | 1                                                | 1                                                          | 1                                                                        |
| Men                                          | <b>2.2 (1.6-3.0)</b>                  | 1.6 (1.0-2.4)                                    | <b>2.3 (1.4-3.9)</b>                                       | <b>2.5 (1.3-5.0)</b>                                                     |
| Age                                          |                                       |                                                  |                                                            |                                                                          |
| 26-29 years                                  | 1                                     | 1                                                | 1                                                          | 1                                                                        |
| 30+ years                                    | <b>1.8 (1.3-2.5)</b>                  | 1.7 (1.0-2.9)                                    | 1.6 (1.0-2.7)                                              | 1.9 (1.0-3.7)                                                            |
| CT and/or GO positivity at same consultation |                                       |                                                  |                                                            |                                                                          |
| No                                           | -                                     | -                                                | -                                                          | -                                                                        |
| Yes                                          | -                                     | -                                                | -                                                          | -                                                                        |
| Self-reported GO/CT/SYPH in past year        |                                       |                                                  |                                                            |                                                                          |
| No                                           | -                                     | -                                                | -                                                          | 1                                                                        |
| Yes                                          | -                                     | -                                                | -                                                          | <b>4.2 (2.0-8.5)</b>                                                     |
| Education level†                             |                                       |                                                  |                                                            |                                                                          |
| High                                         | 1                                     | 1                                                | 1                                                          | 1                                                                        |
| Low/middle                                   | <b>2.8 (2.0-4.0)</b>                  | <b>2.3 (1.4-3.8)</b>                             | <b>3.9 (2.2-7.3)</b>                                       | <b>2.5 (1.4-4.8)</b>                                                     |
| Unknown/other                                | <b>4.2 (2.7-6.4)</b>                  | <b>3.9 (2.1-7.1)</b>                             | <b>5.3 (2.4-11.6)</b>                                      | <b>2.5 (1.0-6.0)</b>                                                     |
| Number of sex partners in past six months    |                                       |                                                  |                                                            |                                                                          |
| 0-1                                          | 1                                     | 1                                                | 1                                                          | -                                                                        |
| 2-3                                          | <b>0.7 (0.5-0.9)</b>                  | <b>0.4 (0.3-0.7)</b>                             | 1.0 (0.6-1.7)                                              | -                                                                        |

|                                        |                         |                         |                         |                      |
|----------------------------------------|-------------------------|-------------------------|-------------------------|----------------------|
| 4+                                     | <b>0.4 (0.3-0.6)</b>    | <b>0.3 (0.2-0.6)</b>    | <b>0.4 (0.2-0.8)</b>    | -                    |
| Condom use†                            |                         |                         |                         |                      |
| No                                     | 1                       | -                       | -                       | 1                    |
| Yes                                    | <b>0.6 (0.4-0.9)</b>    | -                       | -                       | 0.4 (0.2-1.0)        |
| Originating from STI/HIV-endemic area§ |                         |                         |                         |                      |
| No                                     | -                       | -                       | -                       | -                    |
| Yes                                    | -                       | -                       | -                       | -                    |
| Received partner notification          |                         |                         |                         |                      |
| No                                     | 1                       | 1                       | 1                       | 1                    |
| Yes                                    | <b>0.5 (0.3-0.8)</b>    | 0.7 (0.4-1.3)           | 0.6 (0.3-1.1)           | 0.2 (0.0-1.0)        |
| Yes, notified for HIV/syphilis         | <b>18.3 (13.2-25.2)</b> | <b>30.7 (19.4-49.1)</b> | <b>37.7 (20.3-66.6)</b> | <b>4.1 (2.2-7.6)</b> |
| Partner in risk group**                |                         |                         |                         |                      |
| No                                     | -                       | -                       | -                       | -                    |
| Yes                                    | -                       | -                       | -                       | -                    |
| Client of commercial sex worker        |                         |                         |                         |                      |
| No                                     | -                       | -                       | -                       | -                    |
| Yes, in past 6 months                  | -                       | -                       | -                       | -                    |
| Unknown                                | -                       | -                       | -                       | -                    |

Bold = <0.05.

OR, Odds Ratio; CT, chlamydia; GO, gonorrhoea; SYPH, syphilis; STI, sexually transmitted infections.

\* Consultations with missing values <5% on at least one of the determinants were excluded from the analyses.

† Low/middle level of education: no education, elementary school, lbo, mavo, vmbo, mbo-1, havo, vwo, gymnasium. High level education: all other education levels.

‡ Before 2018, condom use was asked regarding last sexual contact. In 2018 this changed to the past 6 months and during vaginal and/or anal sex.

§ STI/HIV-endemic areas include Asia, Africa, the Dutch Caribbean islands, Middle and South America.

\*\* For heterosexual men: partner originating from a high STI/HIV endemic region. For women: partner originating from a high STI/HIV endemic region or a male partner who had sex with men.

**Supplemental table S2.** Determinants of HIV and/or syphilis diagnosis among women and heterosexual men aged >25 years visiting Dutch sexual health centers between 2015-2021, stratified by partner notification

|                                              | Overall model<br>Adjusted OR (95% CI) | No partner notification<br>Adjusted OR (95% CI) | Partner notification - overall<br>Adjusted OR (95% CI) | Partner notification - HIV/syphilis specific<br>Adjusted OR (95% CI) |
|----------------------------------------------|---------------------------------------|-------------------------------------------------|--------------------------------------------------------|----------------------------------------------------------------------|
| Total number of HIV and/or SYPH positive     | 242                                   | 129                                             | 23                                                     | 90                                                                   |
| Total number of consultations*               | 103,822                               | 67,946                                          | 34,370                                                 | 1,506                                                                |
| Sex                                          |                                       |                                                 |                                                        |                                                                      |
| Women                                        | 1                                     | 1                                               | 1                                                      | -                                                                    |
| Men                                          | <b>2.2 (1.6-3.0)</b>                  | <b>2.8 (1.8-4.5)</b>                            | 2.3 (0.9-6.4)                                          | -                                                                    |
| Age                                          |                                       |                                                 |                                                        |                                                                      |
| 26-29 years                                  | 1                                     | 1                                               | -                                                      | -                                                                    |
| 30+ years                                    | <b>1.8 (1.3-2.5)</b>                  | <b>1.7 (1.2-2.7)</b>                            | -                                                      | -                                                                    |
| CT and/or GO positivity at same consultation |                                       |                                                 |                                                        |                                                                      |
| No                                           | -                                     | -                                               | -                                                      | 1                                                                    |
| Yes                                          | -                                     | -                                               | -                                                      | <b>2.3 (1.1-4.5)</b>                                                 |
| Self-reported GO/CT/SYPH in past year        |                                       |                                                 |                                                        |                                                                      |
| No                                           | -                                     | 1                                               | -                                                      | -                                                                    |
| Yes                                          | -                                     | 1.6 (0.9-2.7)                                   | -                                                      | -                                                                    |
| Education level†                             |                                       |                                                 |                                                        |                                                                      |
| High                                         | 1                                     | 1                                               | 1                                                      | 1                                                                    |
| Low/middle                                   | <b>2.8 (2.0-4.0)</b>                  | <b>2.6 (1.7-4.1)</b>                            | <b>2.8 (1.2-7.2)</b>                                   | <b>3.5 (2.0-6.7)</b>                                                 |
| Unknown/other                                | <b>4.2 (2.7-6.4)</b>                  | <b>4.2 (2.5-7.2)</b>                            | 1.4 (0.1-7.8)                                          | <b>4.8 (2.3-10.4)</b>                                                |
| Number of sex partners in past six months    |                                       |                                                 |                                                        |                                                                      |
| 0-1                                          | 1                                     | 1                                               | -                                                      | 1                                                                    |
| 2-3                                          | <b>0.7 (0.5-0.9)</b>                  | <b>0.6 (0.4-0.8)</b>                            | -                                                      | 0.9 (0.5-1.4)                                                        |
| 4+                                           | <b>0.4 (0.3-0.6)</b>                  | <b>0.4 (0.2-0.6)</b>                            | -                                                      | <b>0.4 (0.2-0.7)</b>                                                 |
| Condom use‡                                  |                                       |                                                 |                                                        |                                                                      |
| No                                           | 1                                     | -                                               | -                                                      | 1                                                                    |

|                                        |                         |                          |                         |                       |
|----------------------------------------|-------------------------|--------------------------|-------------------------|-----------------------|
| Yes                                    | <b>0.6 (0.4-0.9)</b>    | -                        | -                       | <b>0.4 (0.2-0.9)</b>  |
| Originating from STI/HIV-endemic area§ |                         |                          |                         |                       |
| No                                     | -                       | -                        | -                       | -                     |
| Yes                                    | -                       | -                        | -                       | -                     |
| Reported STI symptoms                  |                         |                          |                         |                       |
| No                                     | 1                       | 1                        | 1                       | 1                     |
| Yes, overall STI symptoms              | 1.3 (1.0-1.8)           | <b>1.6 (1.1-2.6)</b>     | 1.3 (0.5-3.1)           | 1.6 (0.8-2.8)         |
| Yes, HIV/syphilis symptoms             | <b>34.9 (24.1-50.2)</b> | <b>88.0 (54.5-143.3)</b> | <b>28.9 (1.6-150.0)</b> | <b>9.9 (5.5-17.5)</b> |
| Partner in risk group**                |                         |                          |                         |                       |
| No                                     | -                       | -                        | -                       | 1                     |
| Yes                                    | -                       | -                        | -                       | <b>0.6 (0.3-0.9)</b>  |
| Client of commercial sex worker        |                         |                          |                         |                       |
| No                                     | -                       | 1                        | -                       | 1                     |
| Yes, in past 6 months                  | -                       | 1.4 (0.8-2.4)            | -                       | 0.8 (0.2-2.6)         |
| Unknown                                | -                       | <b>2.6 (1.1-5.3)</b>     | -                       | <b>0.1 (0.0-0.7)</b>  |

Bold = <0.05.

OR, Odds Ratio; CT, chlamydia; GO, gonorrhoea; SYPH, syphilis; STI, sexually transmitted infections.

\* Consultations with missing values <5% on at least one of the determinants were excluded from the analyses.

† Low/middle level of education: no education, elementary school, lbo, mavo, vmbo, mbo-1, havo, vwo, gymnasium. High level education: all other education levels.

‡ Before 2018, condom use was asked regarding last sexual contact. In 2018 this changed to the past 6 months and during vaginal and/or anal sex.

§ STI/HIV-endemic areas include Asia, Africa, the Dutch Caribbean islands, Middle and South America.

\*\* For heterosexual men: partner originating from a high STI/HIV endemic region. For women: partner originating from a high STI/HIV endemic region or a male partner who had sex with men.

**Supplemental table S3.** Sensitivity analyses for determinants of HIV and/or syphilis diagnosis among women and heterosexual men aged >25 years visiting Dutch sexual health centers between 2015-2021

|                                              | Adjusted OR (95% CI) overall model | Adjusted OR (95% CI) HIV infection | Adjusted OR (95% CI) Syphilis infection | Adjusted OR (95% CI) including anal sex, 2016-2021 | Adjusted OR (95% CI) excluding COVID-years, 2015-2019 |
|----------------------------------------------|------------------------------------|------------------------------------|-----------------------------------------|----------------------------------------------------|-------------------------------------------------------|
| Total number of HIV and/or SYPH positive     | 242                                | 74                                 | 169                                     | 210                                                | 165                                                   |
| Total number of consultations*               | 103,822                            | 103,822                            | 103,822                                 | 82,885                                             | 86,223                                                |
| Sex                                          |                                    |                                    |                                         |                                                    |                                                       |
| Women                                        | 1                                  | 1                                  | 1                                       | 1                                                  | 1                                                     |
| Men                                          | <b>2.2 (1.6-3.0)</b>               | <b>2.0 (1.2-3.3)</b>               | <b>2.4 (1.7-3.4)</b>                    | <b>2.5 (1.8-3.5)</b>                               | <b>1.8 (1.3-2.6)</b>                                  |
| Age                                          |                                    |                                    |                                         |                                                    |                                                       |
| 26-29 years                                  | 1                                  | 1                                  | 1                                       | 1                                                  | 1                                                     |
| 30+ years                                    | <b>1.8 (1.3-2.5)</b>               | 1.7 (1.0-3.1)                      | <b>1.9 (1.3-2.8)</b>                    | <b>1.8 (1.3-2.6)</b>                               | 1.4 (1.0-2.1)                                         |
| CT and/or GO positivity at same consultation |                                    |                                    |                                         |                                                    |                                                       |
| No                                           | -                                  | 1                                  | -                                       | -                                                  | 1                                                     |
| Yes                                          | -                                  | 1.7 (0.8-3.0)                      | -                                       | -                                                  | 1.4 (0.9-2.3)                                         |
| Self-reported GO/CT/SYPH in past year        |                                    |                                    |                                         |                                                    |                                                       |
| No                                           | -                                  | 1                                  | 1                                       | 1                                                  | -                                                     |
| Yes                                          | -                                  | 0.4 (0.1-1.1)                      | <b>2.0 (1.2-3.2)</b>                    | 1.5 (0.9-2.4)                                      | -                                                     |
| Education level†                             |                                    |                                    |                                         |                                                    |                                                       |
| High                                         | 1                                  | 1                                  | 1                                       | 1                                                  | 1                                                     |
| Low/middle                                   | <b>2.8 (2.0-4.0)</b>               | <b>2.0 (1.1-3.7)</b>               | <b>3.3 (2.2-4.9)</b>                    | <b>2.4 (1.7-3.5)</b>                               | <b>2.8 (1.9-4.2)</b>                                  |
| Unknown/other                                | <b>4.2 (2.7-6.4)</b>               | <b>5.2 (2.7-10.2)</b>              | <b>3.3 (1.9-5.7)</b>                    | <b>3.9 (2.5-6.1)</b>                               | <b>4.9 (2.9-8.0)</b>                                  |
| Number of sex partners in past six months    |                                    |                                    |                                         |                                                    |                                                       |
| 0-1                                          | 1                                  | 1                                  | 1                                       | 1                                                  | 1                                                     |
| 2-3                                          | <b>0.7 (0.5-0.9)</b>               | <b>0.5 (0.3-0.8)</b>               | 0.9 (0.6-1.3)                           | <b>0.6 (0.4-0.9)</b>                               | 0.7 (0.5-1.0)                                         |
| 4+                                           | <b>0.4 (0.3-0.6)</b>               | <b>0.3 (0.1-0.6)</b>               | <b>0.5 (0.3-0.8)</b>                    | <b>0.4 (0.3-0.6)</b>                               | <b>0.4 (0.3-0.6)</b>                                  |



|                                        |                         |                         |                         |                         |                         |
|----------------------------------------|-------------------------|-------------------------|-------------------------|-------------------------|-------------------------|
| Condom use†                            |                         |                         |                         |                         |                         |
| No                                     | 1                       | -                       | 1                       | -                       | -                       |
| Yes                                    | <b>0.6 (0.4-0.9)</b>    | -                       | 0.6 (0.4-1.0)           | -                       | -                       |
| Originating from STI/HIV-endemic area§ |                         |                         |                         |                         |                         |
| No                                     | -                       | 1                       | 1                       | -                       | -                       |
| Yes                                    | -                       | <b>3.1 (1.8-5.4)</b>    | <b>0.5 (0.3-0.7)</b>    | -                       | -                       |
| Received partner notification          |                         |                         |                         |                         |                         |
| No                                     | 1                       | 1                       | 1                       | 1                       | 1                       |
| Yes                                    | <b>0.5 (0.3-0.8)</b>    | 0.7 (0.3-1.3)           | <b>0.4 (0.2-0.7)</b>    | <b>0.4 (0.2-0.6)</b>    | 0.6 (0.3-1.0)           |
| Yes, notified for HIV/syphilis         | <b>18.3 (13.2-25.2)</b> | <b>23.4 (13.7-39.3)</b> | <b>17.4 (11.6-25.8)</b> | <b>15.4 (10.9-21.8)</b> | <b>20.4 (13.7-30.1)</b> |
| Reported STI symptoms                  |                         |                         |                         |                         |                         |
| No                                     | 1                       | -                       | 1                       | 1                       | 1                       |
| Yes, overall STI symptoms              | 1.3 (1.0-1.8)           | -                       | <b>1.9 (1.3-2.9)</b>    | 1.2 (0.9-1.7)           | 1.3 (0.9-2.0)           |
| Yes, HIV/syphilis symptoms             | <b>34.9 (24.1-50.2)</b> | -                       | <b>64.4 (41.9-99.6)</b> | <b>30.7 (21.0-44.7)</b> | <b>36.6 (23.1-57.4)</b> |
| Partner in risk group**                |                         |                         |                         |                         |                         |
| No                                     | -                       | -                       | -                       | -                       | -                       |
| Yes                                    | -                       | -                       | -                       | -                       | -                       |
| Client of commercial sex worker        |                         |                         |                         |                         |                         |
| No                                     | -                       | -                       | -                       | -                       | -                       |
| Yes, in past 6 months                  | -                       | -                       | -                       | -                       | -                       |
| Unknown                                | -                       | -                       | -                       | -                       | -                       |
| Anal sex in past 6 months              |                         |                         |                         |                         |                         |
| No                                     | NA                      | NA                      | NA                      | 1                       | NA                      |
| Yes, either insertive and/or receptive | NA                      | NA                      | NA                      | <b>1.6 (1.1-2.2)</b>    | NA                      |
| Unknown                                | NA                      | NA                      | NA                      | 1.1 (0.6-1.9)           | NA                      |

Bold = <0.05.

OR, Odds Ratio; CT, chlamydia; GO, gonorrhoea; SYPH, syphilis; STI, sexually transmitted infections; NA, not available.

\* Consultations with missing values <5% on at least one of the determinants were excluded from the analyses.

† Low/middle level of education: no education, elementary school, lbo, mavo, vmbo, mbo-1, havo, vwo, gymnasium. High level education: all other education levels.

1  
2  
3  
4  
5  
6  
7  
8  
9  
10  
11  
12  
13  
14  
15  
16  
17  
18  
19  
20  
21  
22  
23  
24  
25  
26  
27  
28  
29  
30  
31  
32  
33  
34  
35  
36  
37  
38  
39  
40  
41  
42  
43  
44  
45  
46

‡ Before 2018, condom use was asked regarding last sexual contact. In 2018 this changed to the past 6 months and during vaginal and/or anal sex.  
§ STI/HIV-endemic areas include Asia, Africa, the Dutch Caribbean islands, Middle and South America.  
\*\* For heterosexual men: partner originating from a high STI/HIV endemic region. For women: partner originating from a high STI/HIV endemic region or a male partner who had sex with men.

For peer review only

STROBE Statement—Checklist of items that should be included in reports of *cross-sectional studies*

|                              | Item No | Recommendation                                                                                                                                                                                               | Page No      |
|------------------------------|---------|--------------------------------------------------------------------------------------------------------------------------------------------------------------------------------------------------------------|--------------|
| <b>Title and abstract</b>    | 1       | (a) Indicate the study's design with a commonly used term in the title or the abstract                                                                                                                       | 2            |
|                              |         | (b) Provide in the abstract an informative and balanced summary of what was done and what was found                                                                                                          | 2            |
| <b>Introduction</b>          |         |                                                                                                                                                                                                              |              |
| Background/rationale         | 2       | Explain the scientific background and rationale for the investigation being reported                                                                                                                         | 4            |
| Objectives                   | 3       | State specific objectives, including any prespecified hypotheses                                                                                                                                             | 4            |
| <b>Methods</b>               |         |                                                                                                                                                                                                              |              |
| Study design                 | 4       | Present key elements of study design early in the paper                                                                                                                                                      | 4            |
| Setting                      | 5       | Describe the setting, locations, and relevant dates, including periods of recruitment, exposure, follow-up, and data collection                                                                              | 4-5          |
| Participants                 | 6       | (a) Give the eligibility criteria, and the sources and methods of selection of participants                                                                                                                  | 5            |
| Variables                    | 7       | Clearly define all outcomes, exposures, predictors, potential confounders, and effect modifiers. Give diagnostic criteria, if applicable                                                                     | 5            |
| Data sources/<br>measurement | 8*      | For each variable of interest, give sources of data and details of methods of assessment (measurement). Describe comparability of assessment methods if there is more than one group                         | 4-5          |
| Bias                         | 9       | Describe any efforts to address potential sources of bias                                                                                                                                                    | 5            |
| Study size                   | 10      | Explain how the study size was arrived at                                                                                                                                                                    | 4-5          |
| Quantitative variables       | 11      | Explain how quantitative variables were handled in the analyses. If applicable, describe which groupings were chosen and why                                                                                 | 5            |
| Statistical methods          | 12      | (a) Describe all statistical methods, including those used to control for confounding                                                                                                                        | 5-6          |
|                              |         | (b) Describe any methods used to examine subgroups and interactions                                                                                                                                          | 6            |
|                              |         | (c) Explain how missing data were addressed                                                                                                                                                                  | 5            |
|                              |         | (d) If applicable, describe analytical methods taking account of sampling strategy                                                                                                                           | -            |
|                              |         | (e) Describe any sensitivity analyses                                                                                                                                                                        | 6            |
| <b>Results</b>               |         |                                                                                                                                                                                                              |              |
| Participants                 | 13*     | (a) Report numbers of individuals at each stage of study—eg numbers potentially eligible, examined for eligibility, confirmed eligible, included in the study, completing follow-up, and analysed            | 7            |
|                              |         | (b) Give reasons for non-participation at each stage                                                                                                                                                         | 7            |
|                              |         | (c) Consider use of a flow diagram                                                                                                                                                                           | 7            |
| Descriptive data             | 14*     | (a) Give characteristics of study participants (eg demographic, clinical, social) and information on exposures and potential confounders                                                                     | 7 &<br>15-17 |
|                              |         | (b) Indicate number of participants with missing data for each variable of interest                                                                                                                          | 15-17        |
| Outcome data                 | 15*     | Report numbers of outcome events or summary measures                                                                                                                                                         | 15-17        |
| Main results                 | 16      | (a) Give unadjusted estimates and, if applicable, confounder-adjusted estimates and their precision (eg, 95% confidence interval). Make clear which confounders were adjusted for and why they were included | 7 &<br>16-17 |

|                          |    |                                                                                                                                                                            |      |
|--------------------------|----|----------------------------------------------------------------------------------------------------------------------------------------------------------------------------|------|
|                          |    | (b) Report category boundaries when continuous variables were categorized                                                                                                  | -    |
|                          |    | (c) If relevant, consider translating estimates of relative risk into absolute risk for a meaningful time period                                                           | -    |
| Other analyses           | 17 | Report other analyses done—eg analyses of subgroups and interactions, and sensitivity analyses                                                                             | 7-8  |
| <b>Discussion</b>        |    |                                                                                                                                                                            |      |
| Key results              | 18 | Summarise key results with reference to study objectives                                                                                                                   | 8    |
| Limitations              | 19 | Discuss limitations of the study, taking into account sources of potential bias or imprecision. Discuss both direction and magnitude of any potential bias                 | 8-9  |
| Interpretation           | 20 | Give a cautious overall interpretation of results considering objectives, limitations, multiplicity of analyses, results from similar studies, and other relevant evidence | 9-10 |
| Generalisability         | 21 | Discuss the generalisability (external validity) of the study results                                                                                                      | 10   |
| <b>Other information</b> |    |                                                                                                                                                                            |      |
| Funding                  | 22 | Give the source of funding and the role of the funders for the present study and, if applicable, for the original study on which the present article is based              | 11   |

\*Give information separately for exposed and unexposed groups.

**Note:** An Explanation and Elaboration article discusses each checklist item and gives methodological background and published examples of transparent reporting. The STROBE checklist is best used in conjunction with this article (freely available on the Web sites of PLoS Medicine at <http://www.plosmedicine.org/>, Annals of Internal Medicine at <http://www.annals.org/>, and Epidemiology at <http://www.epidem.com/>). Information on the STROBE Initiative is available at [www.strobe-statement.org](http://www.strobe-statement.org).
