# Supplementary material for: HIV and syphilis testing for women and heterosexual men aged above 25 years in the Netherlands: possibilities for targeted testing at sexual health centres
Source: PubMed Central journal article supplement — BMJ Open. 2023 Sep 18;13(9):e072862. doi: 10.1136/bmjopen-2023-072862 (PMC10510951; doi:10.1136/bmjopen-2023-072862), 2023-09-18
Supplement: bmjopen-2023-072862supp001.pdf [file bmjopen-2023-072862supp001.pdf]

**Supplemental table S1.** Determinants of an HIV and/or syphilis diagnosis among women and heterosexual men aged >25 years visiting Dutch sexual health centres between 2015-2021, stratified by STI symptoms

|                                              | Overall model           | No reported STI symptoms | Reported STI symptoms - overall | Reported STI symptoms - HIV/syphilis specific |
|----------------------------------------------|-------------------------|--------------------------|---------------------------------|-----------------------------------------------|
|                                              | Adjusted OR (95% CI)    | Adjusted OR (95% CI)     | Adjusted OR (95% CI)            | Adjusted OR (95% CI)                          |
| Total number of HIV and/or SYPH positive     | 242                     | 94                       | 78                              | 70                                            |
| Total number of consultations*               | 103 822                 | 58 454                   | 44 805                          | 563                                           |
| Sex                                          |                         |                          |                                 |                                               |
| Women                                        | 1                       | 1                        | 1                               | 1                                             |
| Men                                          | <b>2.2 (1.6 to 3.0)</b> | 1.6 (1.0 to 2.4)         | <b>2.3 (1.4 to 3.9)</b>         | <b>2.5 (1.3 to 5.0)</b>                       |
| Age                                          |                         |                          |                                 |                                               |
| 26-29 years                                  | 1                       | 1                        | 1                               | 1                                             |
| 30+ years                                    | <b>1.8 (1.3 to 2.5)</b> | 1.7 (1.0 to 2.9)         | 1.6 (1.0 to 2.7)                | 1.9 (1.0 to 3.7)                              |
| CT and/or GO positivity at same consultation |                         |                          |                                 |                                               |
| No                                           | -                       | -                        | -                               | -                                             |
| Yes                                          | -                       | -                        | -                               | -                                             |
| Self-reported GO/CT/SYPH in past year        |                         |                          |                                 |                                               |
| No                                           | -                       | -                        | -                               | 1                                             |
| Yes                                          | -                       | -                        | -                               | <b>4.2 (2.0 to 8.5)</b>                       |
| Education level†                             |                         |                          |                                 |                                               |
| High                                         | 1                       | 1                        | 1                               | 1                                             |
| Low/middle                                   | <b>2.8 (2.0 to 4.0)</b> | <b>2.3 (1.4 to 3.8)</b>  | <b>3.9 (2.2 to 7.3)</b>         | <b>2.5 (1.4 to 4.8)</b>                       |
| Unknown/other                                | <b>4.2 (2.7 to 6.4)</b> | <b>3.9 (2.1 to 7.1)</b>  | <b>5.3 (2.4 to 11.6)</b>        | <b>2.5 (1.0 to 6.0)</b>                       |
| Number of sex partners in past six months    |                         |                          |                                 |                                               |
| 0-1                                          | 1                       | 1                        | 1                               | -                                             |
| 2-3                                          | <b>0.7 (0.5 to 0.9)</b> | <b>0.4 (0.3 to 0.7)</b>  | 1.0 (0.6 to 1.7)                | -                                             |
| 4+                                           | <b>0.4 (0.3 to 0.6)</b> | <b>0.3 (0.2 to 0.6)</b>  | <b>0.4 (0.2 to 0.8)</b>         | -                                             |
| Condom use‡                                  |                         |                          |                                 |                                               |

|                                        |                            |                            |                            |                         |
|----------------------------------------|----------------------------|----------------------------|----------------------------|-------------------------|
| No                                     | 1                          | -                          | -                          | 1                       |
| Yes                                    | <b>0.6 (0.4 to 0.9)</b>    | -                          | -                          | 0.4 (0.2 to 1.0)        |
| Originating from STI/HIV-endemic area§ |                            |                            |                            |                         |
| No                                     | -                          | -                          | -                          | -                       |
| Yes                                    | -                          | -                          | -                          | -                       |
| Received partner notification          |                            |                            |                            |                         |
| No                                     | 1                          | 1                          | 1                          | 1                       |
| Yes                                    | <b>0.5 (0.3 to 0.8)</b>    | 0.7 (0.4 to 1.3)           | 0.6 (0.3 to 1.1)           | 0.2 (0.0 to 1.0)        |
| Yes, notified for HIV/syphilis         | <b>18.3 (13.2 to 25.2)</b> | <b>30.7 (19.4 to 49.1)</b> | <b>37.7 (20.3 to 66.6)</b> | <b>4.1 (2.2 to 7.6)</b> |
| Partner in risk group¶                 |                            |                            |                            |                         |
| No                                     | -                          | -                          | -                          | -                       |
| Yes                                    | -                          | -                          | -                          | -                       |
| Client of commercial sex worker        |                            |                            |                            |                         |
| No                                     | -                          | -                          | -                          | -                       |
| Yes, in past 6 months                  | -                          | -                          | -                          | -                       |
| Unknown                                | -                          | -                          | -                          | -                       |

Bold  $\leq 0.05$ .

\*Consultations with missing values <5% on at least one of the determinants were excluded from the analyses.

†Low/middle level of education: no education, elementary school, lbo, mavo, vmbo, mbo-1, havo, vwo, gymnasium. High level education: all other education levels.

‡Before 2018, condom use was asked regarding last sexual contact. In 2018 this changed to the past 6 months and during vaginal and/or anal sex.

§STI/HIV-endemic areas include Asia, Africa, the Dutch Caribbean islands, Middle and South America.

¶For heterosexual men: partner originating from a high STI/HIV endemic region. For women: partner originating from a high STI/HIV endemic region or a male partner who had sex with men.  
CT, chlamydia; GO, gonorrhoea; STI, sexually transmitted infections; SYPH, syphilis.
