# Supplementary material for: HIV and syphilis testing for women and heterosexual men aged above 25 years in the Netherlands: possibilities for targeted testing at sexual health centres
Source: PubMed Central journal article supplement — BMJ Open. 2023 Sep 18;13(9):e072862. doi: 10.1136/bmjopen-2023-072862 (PMC10510951; doi:10.1136/bmjopen-2023-072862), 2023-09-18
Supplement: bmjopen-2023-072862supp002.pdf [file bmjopen-2023-072862supp002.pdf]

**Supplemental table S2.** Determinants of HIV and/or syphilis diagnosis among women and heterosexual men aged >25 years visiting Dutch sexual health centres between 2015-2021, stratified by partner notification

|                                                     | <b>Overall model</b>        | <b>No partner notification</b> | <b>Partner notification - overall</b> | <b>Partner notification - HIV/syphilis specific</b> |
|-----------------------------------------------------|-----------------------------|--------------------------------|---------------------------------------|-----------------------------------------------------|
|                                                     | <b>Adjusted OR (95% CI)</b> | <b>Adjusted OR (95% CI)</b>    | <b>Adjusted OR (95% CI)</b>           | <b>Adjusted OR (95% CI)</b>                         |
| Total number of HIV and/or SYPH positive            | 242                         | 129                            | 23                                    | 90                                                  |
| Total number of consultations*                      | 103 822                     | 67 946                         | 34 370                                | 1 506                                               |
| <b>Sex</b>                                          |                             |                                |                                       |                                                     |
| Women                                               | 1                           | 1                              | 1                                     | -                                                   |
| Men                                                 | <b>2.2 (1.6 to 3.0)</b>     | <b>2.8 (1.8 to 4.5)</b>        | 2.3 (0.9 to 6.4)                      | -                                                   |
| <b>Age</b>                                          |                             |                                |                                       |                                                     |
| 26-29 years                                         | 1                           | 1                              | -                                     | -                                                   |
| 30+ years                                           | <b>1.8 (1.3 to 2.5)</b>     | <b>1.7 (1.2 to 2.7)</b>        | -                                     | -                                                   |
| <b>CT and/or GO positivity at same consultation</b> |                             |                                |                                       |                                                     |
| No                                                  | -                           | -                              | -                                     | 1                                                   |
| Yes                                                 | -                           | -                              | -                                     | <b>2.3 (1.1 to 4.5)</b>                             |
| <b>Self-reported GO/CT/SYPH in past year</b>        |                             |                                |                                       |                                                     |
| No                                                  | -                           | 1                              | -                                     | -                                                   |
| Yes                                                 | -                           | 1.6 (0.9 to 2.7)               | -                                     | -                                                   |
| <b>Education level†</b>                             |                             |                                |                                       |                                                     |
| High                                                | 1                           | 1                              | 1                                     | 1                                                   |
| Low/middle                                          | <b>2.8 (2.0 to 4.0)</b>     | <b>2.6 (1.7 to 4.1)</b>        | <b>2.8 (1.2 to 7.2)</b>               | <b>3.5 (2.0 to 6.7)</b>                             |
| Unknown/other                                       | <b>4.2 (2.7 to 6.4)</b>     | <b>4.2 (2.5 to 7.2)</b>        | 1.4 (0.1 to 7.8)                      | <b>4.8 (2.3 to 10.4)</b>                            |
| <b>Number of sex partners in past six months</b>    |                             |                                |                                       |                                                     |
| 0-1                                                 | 1                           | 1                              | -                                     | 1                                                   |
| 2-3                                                 | <b>0.7 (0.5 to 0.9)</b>     | <b>0.6 (0.4 to 0.8)</b>        | -                                     | 0.9 (0.5 to 1.4)                                    |
| 4+                                                  | <b>0.4 (0.3 to 0.6)</b>     | <b>0.4 (0.2 to 0.6)</b>        | -                                     | <b>0.4 (0.2 to 0.7)</b>                             |
| <b>Condom use‡</b>                                  |                             |                                |                                       |                                                     |
| No                                                  | 1                           | -                              | -                                     | 1                                                   |

|                                                                                                                                                                                                                                                                                                                                                                                                                                                                                                                                                                                                                                                                                                                                                                                                                                                                                                 |                            |                             |                            |                          |
|-------------------------------------------------------------------------------------------------------------------------------------------------------------------------------------------------------------------------------------------------------------------------------------------------------------------------------------------------------------------------------------------------------------------------------------------------------------------------------------------------------------------------------------------------------------------------------------------------------------------------------------------------------------------------------------------------------------------------------------------------------------------------------------------------------------------------------------------------------------------------------------------------|----------------------------|-----------------------------|----------------------------|--------------------------|
| Yes                                                                                                                                                                                                                                                                                                                                                                                                                                                                                                                                                                                                                                                                                                                                                                                                                                                                                             | <b>0.6 (0.4 to 0.9)</b>    | -                           | -                          | <b>0.4 (0.2 to 0.9)</b>  |
| Originating from STI/HIV-endemic area§                                                                                                                                                                                                                                                                                                                                                                                                                                                                                                                                                                                                                                                                                                                                                                                                                                                          |                            |                             |                            |                          |
| No                                                                                                                                                                                                                                                                                                                                                                                                                                                                                                                                                                                                                                                                                                                                                                                                                                                                                              | -                          | -                           | -                          | -                        |
| Yes                                                                                                                                                                                                                                                                                                                                                                                                                                                                                                                                                                                                                                                                                                                                                                                                                                                                                             | -                          | -                           | -                          | -                        |
| Reported STI symptoms                                                                                                                                                                                                                                                                                                                                                                                                                                                                                                                                                                                                                                                                                                                                                                                                                                                                           |                            |                             |                            |                          |
| No                                                                                                                                                                                                                                                                                                                                                                                                                                                                                                                                                                                                                                                                                                                                                                                                                                                                                              | 1                          | 1                           | 1                          | 1                        |
| Yes, overall STI symptoms                                                                                                                                                                                                                                                                                                                                                                                                                                                                                                                                                                                                                                                                                                                                                                                                                                                                       | 1.3 (1.0 to 1.8)           | <b>1.6 (1.1 to 2.6)</b>     | 1.3 (0.5 to 3.1)           | 1.6 (0.8 to 2.8)         |
| Yes, HIV/syphilis symptoms                                                                                                                                                                                                                                                                                                                                                                                                                                                                                                                                                                                                                                                                                                                                                                                                                                                                      | <b>34.9 (24.1 to 50.2)</b> | <b>88.0 (54.5 to 143.3)</b> | <b>28.9 (1.6 to 150.0)</b> | <b>9.9 (5.5 to 17.5)</b> |
| Partner in risk group¶                                                                                                                                                                                                                                                                                                                                                                                                                                                                                                                                                                                                                                                                                                                                                                                                                                                                          |                            |                             |                            |                          |
| No                                                                                                                                                                                                                                                                                                                                                                                                                                                                                                                                                                                                                                                                                                                                                                                                                                                                                              | -                          | -                           | -                          | 1                        |
| Yes                                                                                                                                                                                                                                                                                                                                                                                                                                                                                                                                                                                                                                                                                                                                                                                                                                                                                             | -                          | -                           | -                          | <b>0.6 (0.3 to 0.9)</b>  |
| Client of commercial sex worker                                                                                                                                                                                                                                                                                                                                                                                                                                                                                                                                                                                                                                                                                                                                                                                                                                                                 |                            |                             |                            |                          |
| No                                                                                                                                                                                                                                                                                                                                                                                                                                                                                                                                                                                                                                                                                                                                                                                                                                                                                              | -                          | 1                           | -                          | 1                        |
| Yes, in past 6 months                                                                                                                                                                                                                                                                                                                                                                                                                                                                                                                                                                                                                                                                                                                                                                                                                                                                           | -                          | 1.4 (0.8 to 2.4)            | -                          | 0.8 (0.2 to 2.6)         |
| Unknown                                                                                                                                                                                                                                                                                                                                                                                                                                                                                                                                                                                                                                                                                                                                                                                                                                                                                         | -                          | <b>2.6 (1.1 to 5.3)</b>     | -                          | <b>0.1 (0.0 to 0.7)</b>  |
| <p>Bold <math>\leq 0.05</math>.</p> <p>*Consultations with missing values &lt;5% on at least one of the determinants were excluded from the analyses.</p> <p>†Low/middle level of education: no education, elementary school, lbo, mavo, vmbo, mbo-1, havo, vwo, gymnasium. High level education: all other education levels.</p> <p>‡Before 2018, condom use was asked regarding last sexual contact. In 2018 this changed to the past 6 months and during vaginal and/or anal sex.</p> <p>§STI/HIV-endemic areas include Asia, Africa, the Dutch Caribbean islands, Middle and South America.</p> <p>¶For heterosexual men: partner originating from a high STI/HIV endemic region. For women: partner originating from a high STI/HIV endemic region or a male partner who had sex with men.</p> <p>CT, chlamydia; GO, gonorrhoea; STI, sexually transmitted infections; SYPH, syphilis.</p> |                            |                             |                            |                          |
