# Supplementary material for: HIV and syphilis testing for women and heterosexual men aged above 25 years in the Netherlands: possibilities for targeted testing at sexual health centres
Source: PubMed Central journal article supplement — BMJ Open. 2023 Sep 18;13(9):e072862. doi: 10.1136/bmjopen-2023-072862 (PMC10510951; doi:10.1136/bmjopen-2023-072862), 2023-09-18
Supplement: bmjopen-2023-072862supp003.pdf [file bmjopen-2023-072862supp003.pdf]

**Supplemental table S3.** Sensitivity analyses for determinants of HIV and/or syphilis diagnosis among women and heterosexual men aged >25 years visiting Dutch sexual health centres between 2015-2021

|                                              | Adjusted OR (95% CI) overall model | Adjusted OR (95% CI) HIV infection | Adjusted OR (95% CI) Syphilis infection | Adjusted OR (95% CI) including anal sex, 2016-2021 | Adjusted OR (95% CI) excluding COVID-years, 2015-2019 |
|----------------------------------------------|------------------------------------|------------------------------------|-----------------------------------------|----------------------------------------------------|-------------------------------------------------------|
| Total number of HIV and/or SYPH positive     | 242                                | 74                                 | 169                                     | 210                                                | 165                                                   |
| Total number of consultations*               | 103 822                            | 103 822                            | 103 822                                 | 82 885                                             | 86 223                                                |
| Sex                                          |                                    |                                    |                                         |                                                    |                                                       |
| Women                                        | 1                                  | 1                                  | 1                                       | 1                                                  | 1                                                     |
| Men                                          | <b>2.2 (1.6 to 3.0)</b>            | <b>2.0 (1.2 to 3.3)</b>            | <b>2.4 (1.7 to 3.4)</b>                 | <b>2.5 (1.8 to 3.5)</b>                            | <b>1.8 (1.3 to 2.6)</b>                               |
| Age                                          |                                    |                                    |                                         |                                                    |                                                       |
| 26-29 years                                  | 1                                  | 1                                  | 1                                       | 1                                                  | 1                                                     |
| 30+ years                                    | <b>1.8 (1.3 to 2.5)</b>            | 1.7 (1.0 to 3.1)                   | <b>1.9 (1.3 to 2.8)</b>                 | <b>1.8 (1.3 to 2.6)</b>                            | 1.4 (1.0 to 2.1)                                      |
| CT and/or GO positivity at same consultation |                                    |                                    |                                         |                                                    |                                                       |
| No                                           | -                                  | 1                                  | -                                       | -                                                  | 1                                                     |
| Yes                                          | -                                  | 1.7 (0.8 to 3.0)                   | -                                       | -                                                  | 1.4 (0.9 to 2.3)                                      |
| Self-reported GO/CT/SYPH in past year        |                                    |                                    |                                         |                                                    |                                                       |
| No                                           | -                                  | 1                                  | 1                                       | 1                                                  | -                                                     |
| Yes                                          | -                                  | 0.4 (0.1 to 1.1)                   | <b>2.0 (1.2 to 3.2)</b>                 | 1.5 (0.9 to 2.4)                                   | -                                                     |
| Education level‡                             |                                    |                                    |                                         |                                                    |                                                       |
| High                                         | 1                                  | 1                                  | 1                                       | 1                                                  | 1                                                     |
| Low/middle                                   | <b>2.8 (2.0 to 4.0)</b>            | <b>2.0 (1.1 to 3.7)</b>            | <b>3.3 (2.2 to 4.9)</b>                 | <b>2.4 (1.7 to 3.5)</b>                            | <b>2.8 (1.9 to 4.2)</b>                               |
| Unknown/other                                | <b>4.2 (2.7 to 6.4)</b>            | <b>5.2 (2.7 to 10.2)</b>           | <b>3.3 (1.9 to 5.7)</b>                 | <b>3.9 (2.5 to 6.1)</b>                            | <b>4.9 (2.9 to 8.0)</b>                               |
| Number of sex partners in past six months    |                                    |                                    |                                         |                                                    |                                                       |
| 0-1                                          | 1                                  | 1                                  | 1                                       | 1                                                  | 1                                                     |
| 2-3                                          | <b>0.7 (0.5 to 0.9)</b>            | <b>0.5 (0.3 to 0.8)</b>            | 0.9 (0.6 to 1.3)                        | <b>0.6 (0.4 to 0.9)</b>                            | 0.7 (0.5 to 1.0)                                      |
| 4+                                           | <b>0.4 (0.3 to 0.6)</b>            | <b>0.3 (0.1 to 0.6)</b>            | <b>0.5 (0.3 to 0.8)</b>                 | <b>0.4 (0.3 to 0.6)</b>                            | <b>0.4 (0.3 to 0.6)</b>                               |
| Condom use‡                                  |                                    |                                    |                                         |                                                    |                                                       |

|                                        |                            |                            |                            |                            |                            |
|----------------------------------------|----------------------------|----------------------------|----------------------------|----------------------------|----------------------------|
| No                                     | 1                          | -                          | 1                          | -                          | -                          |
| Yes                                    | <b>0.6 (0.4 to 0.9)</b>    | -                          | 0.6 (0.4 to 1.0)           | -                          | -                          |
| Originating from STI/HIV-endemic area§ |                            |                            |                            |                            |                            |
| No                                     | -                          | 1                          | 1                          | -                          | -                          |
| Yes                                    | -                          | <b>3.1 (1.8 to 5.4)</b>    | <b>0.5 (0.3 to 0.7)</b>    | -                          | -                          |
| Received partner notification          |                            |                            |                            |                            |                            |
| No                                     | 1                          | 1                          | 1                          | 1                          | 1                          |
| Yes                                    | <b>0.5 (0.3 to 0.8)</b>    | 0.7 (0.3 to 1.3)           | <b>0.4 (0.2 to 0.7)</b>    | <b>0.4 (0.2 to 0.6)</b>    | 0.6 (0.3 to 1.0)           |
| Yes, notified for HIV/syphilis         | <b>18.3 (13.2 to 25.2)</b> | <b>23.4 (13.7 to 39.3)</b> | <b>17.4 (11.6 to 25.8)</b> | <b>15.4 (10.9 to 21.8)</b> | <b>20.4 (13.7 to 30.1)</b> |
| Reported STI symptoms                  |                            |                            |                            |                            |                            |
| No                                     | 1                          | -                          | 1                          | 1                          | 1                          |
| Yes, overall STI symptoms              | 1.3 (1.0 to 1.8)           | -                          | <b>1.9 (1.3 to 2.9)</b>    | 1.2 (0.9 to 1.7)           | 1.3 (0.9 to 2.0)           |
| Yes, HIV/syphilis symptoms             | <b>34.9 (24.1 to 50.2)</b> | -                          | <b>64.4 (41.9 to 99.6)</b> | <b>30.7 (21.0 to 44.7)</b> | <b>36.6 (23.1 to 57.4)</b> |
| Partner in risk group¶                 |                            |                            |                            |                            |                            |
| No                                     | -                          | -                          | -                          | -                          | -                          |
| Yes                                    | -                          | -                          | -                          | -                          | -                          |
| Client of commercial sex worker        |                            |                            |                            |                            |                            |
| No                                     | -                          | -                          | -                          | -                          | -                          |
| Yes, in past 6 months                  | -                          | -                          | -                          | -                          | -                          |
| Unknown                                | -                          | -                          | -                          | -                          | -                          |
| Anal sex in past 6 months              |                            |                            |                            |                            |                            |
| No                                     | NA                         | NA                         | NA                         | 1                          | NA                         |
| Yes, either insertive and/or receptive | NA                         | NA                         | NA                         | <b>1.6 (1.1 to 2.2)</b>    | NA                         |
| Unknown                                | NA                         | NA                         | NA                         | 1.1 (0.6 to 1.9)           | NA                         |

Bold ≤0.05.

\*Consultations with missing values <5% on at least one of the determinants were excluded from the analyses.

†Low/middle level of education: no education, elementary school, lbo, mavo, vmbo, mbo-1, havo, vwo, gymnasium. High level education: all other education levels.

‡Before 2018, condom use was asked regarding last sexual contact. In 2018 this changed to the past 6 months and during vaginal and/or anal sex.

§STI/HIV-endemic areas include Asia, Africa, the Dutch Caribbean islands, Middle and South America.

¶For heterosexual men: partner originating from a high STI/HIV endemic region. For women: partner originating from a high STI/HIV endemic region or a male partner who had sex with men.  
CT, chlamydia; GO, gonorrhoea; STI, sexually transmitted infections; SYPH, syphilis.
